# Supplementary material for: Isopropylmagnesium chloride-promoted unilateral addition of Grignard reagents to β-diketones: one-pot syntheses of β-tertiary hydroxyl ketones or 3-substituted cyclic-2-enones
Source: Royal Society of Chemistry journal article supplement (doi:10.1039/c5ob02072g), 2015-11-05
Supplement: c5ob02072g1.pdf [file c5ob02072g1.pdf]

## Supporting Information

### Isopropylmagnesium Chloride-promoted Unilateral Addition of Grignards to $\beta$ -Diketones: One-pot Syntheses of $\beta$ -Tertiary Alcohol Ketones or 3- Substituted Cyclic-2-Enones

Rui Yuan<sup>a,b\*</sup>, Dan Zhao<sup>a</sup>, Li-Yuan Zhang<sup>a</sup>, Xiang Pan<sup>a</sup>, Yan Yang<sup>a</sup>, Pei  
Wang<sup>a</sup>, Hong-Feng Li<sup>a</sup>, Chao-Shan Da<sup>a,b,c\*</sup>

<sup>a</sup>Institute of Biochemistry and Molecular Biology, School of Life Sciences, Lanzhou University,  
Lanzhou 730000, China.

<sup>b</sup>State Key Laboratory of Applied Organic Chemistry, Lanzhou University, Lanzhou 730000, China.

<sup>c</sup>Key Lab of Preclinical Study for New Drugs of Gansu Province, Lanzhou University, Lanzhou  
730000, China.

18293133274@163.com

#### Content

|                                                                                                                         |     |
|-------------------------------------------------------------------------------------------------------------------------|-----|
| 1. General.....                                                                                                         | S2  |
| 2. General procedure for the preparation of $\beta$ -tertiary alcohol ketones and<br>characterization of compounds..... | S2  |
| 3. General procedure for the preparation of 3-substituted cyclic-2-enones and<br>characterization of compounds.....     | S6  |
| 4. NMR spectra .....                                                                                                    | S9  |
| 5. NMR and mass spectrometry for reaction mechanism.....                                                                | S41 |
| 6. General Procedure for the sequential Grignard<br>reactions.....                                                      | S45 |
| 7. References .....                                                                                                     | S46 |

## 1. General

All reactions were performed under an argon atmosphere and solvents were dried according to the established procedures ahead of use. All reagents were commercial. The reactions were monitored by TLC (thin layer chromatography) method; column and preparative TLC purification were carried out using silica gel. Melting points were uncorrected and recorded on X-4 melting point apparatus.  $^1\text{H}$  NMR and  $^{13}\text{C}$  NMR spectra were measured on 400 MHz and 100 MHz spectrometers (NMR in  $\text{CDCl}_3$  with TMS as an internal standard), respectively, and recorded as ppm. HR-MS were measured with Thermo Scientific Orbitrap Elite LTQ-06-ETD mass spectrometer.

## 2. General Procedure for the preparation of $\beta$ -tertiary alcohol substrate.

To a solution of *i*-PrMgCl (0.77 M, 0.13 mL, 0.1 mmol, 0.2 eq.) was dropwise added the 1,3-diketone (0.5 mmol, 1.0 eq.) in anhydrous THF (1 mL) at 0 °C. The mixture was stirred for 30 min at 0 °C and then the bromide Grignard reagent (1.25 mmol, 2.5 eq.) was introduced. The mixture was warmed to 40 °C. After stirring for 4 h at 40 °C, the reaction was carefully quenched with 25 mL 10% aqueous solution of acetic acid at 0 °C. The aqueous layer was extracted with ether (3×15 mL) and the combined organic layer was dried with anhydrous  $\text{Na}_2\text{SO}_4$ . The solvent was then evaporated under the reduced pressure and the residue was purified by column chromatography.

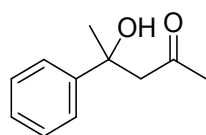

**4-hydroxy-4-phenylpentan-2-one (1)**<sup>1</sup>. Yield 165 mg, 93%; pale yellow oil;  $^1\text{H}$  NMR (400MHz,  $\text{CDCl}_3$ )  $\delta$  7.44-7.20 (m, 5H), 4.54 (s, 1H), 3.19 (d,  $J$  = 16.8 Hz, 1H), 2.84 (d,  $J$  = 17.2 Hz, 1H), 2.07 (s, 3H), 1.58 (s, 3H).

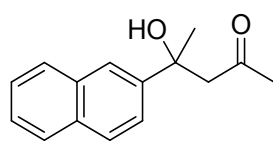

**4-hydroxy-4-(naphthalen-2-yl)pentan-2-one (2)**. Yield 207 mg, 91%; yellow oil;  $^1\text{H}$  NMR (400 MHz,  $\text{CDCl}_3$ )  $\delta$  7.91-7.24 (m, 7H), 4.71 (s, 1H), 3.28 (d,  $J$  = 16.8 Hz, 1H), 2.91 (d,  $J$  = 16.8 Hz, 1H), 2.06 (s, 3H), 1.59 (s, 3H);  $^{13}\text{C}$  NMR (75 MHz,  $\text{CDCl}_3$ )  $\delta$  210.6, 144.5, 133.1, 132.2, 128.1, 128.0, 127.4, 126.0, 125.7, 122.8, 73.4, 53.6, 31.8, 30.5; HRMS calcd for  $\text{C}_{15}\text{H}_{16}\text{NaO}_2$  [ $\text{M}+\text{Na}$ ]<sup>+</sup> 251.1048, found 251.1040.

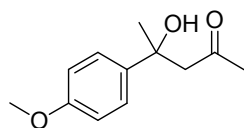

**4-hydroxy-4-(4-methoxyphenyl)pentan-2-one (3)**<sup>2</sup>. Yield 180 mg, 87%; yellow oil;  $^1\text{H}$  NMR (400 MHz,  $\text{CDCl}_3$ )  $\delta$  7.34-6.84 (m, 4H), 4.47 (s, 1H), 3.78 (s, 3H), 3.15 (d,  $J$  = 17.2 Hz, 1H), 2.82 (d,  $J$  = 16.8 Hz, 1H), 2.06 (s, 3H), 1.49 (s, 3H).

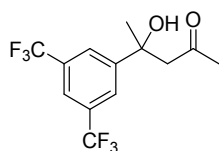

**4-(3,5-bis(trifluoromethyl)phenyl)-4-hydroxypentan-2-one (4)**. Yield 292 mg, 93%; yellow oil;  $^1\text{H}$  NMR (400 MHz,  $\text{CDCl}_3$ )  $\delta$  7.90-7.77 (m, 3H), 4.78 (s, 1H), 3.17 (d,  $J$  = 17.6 Hz, 1H), 2.98 (d,  $J$  = 17.6 Hz, 1H), 2.16 (s, 3H), 1.55 (s, 3H);  $^{13}\text{C}$  NMR (100 MHz,  $\text{CDCl}_3$ )  $\delta$

210.0, 150.2, 131.8, 131.4, 124.7, 122.0, 120.9, 72.9, 53.2, 31.6, 30.3; HRMS calcd for  $C_{13}H_{12}F_6NaO_2$   $[M+Na]^+$  337.0639, found 337.0637.

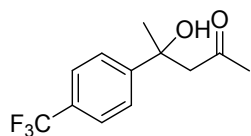

**4-hydroxy-4-(4-(trifluoromethyl)phenyl)pentan-2-one (5)<sup>2</sup>.**

Yield 211 mg, 86%; yellow oil;  $^1H$  NMR (400 MHz,  $CDCl_3$ )  $\delta$  7.52-7.29 (m, 4H), 4.76 (s, 1H), 3.17 (d,  $J = 17.6$  Hz, 1H), 2.98 (d,  $J = 17.6$  Hz, 1H), 2.17 (s, 3H), 1.56 (s, 3H).

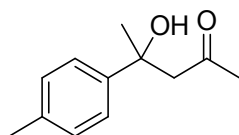

**4-hydroxy-4-(p-tolyl)pentan-2-one (6)<sup>3</sup>.**

Yield 168 mg, 88%; yellow solid, mp 24.9-27.1 °C;  $^1H$  NMR (400 MHz,  $CDCl_3$ )  $\delta$  7.31-7.12 (m, 4H), 4.50 (s, 1H), 3.17 (d,  $J = 17.2$  Hz, 1H), 2.82 (d,  $J = 17.2$  Hz, 1H), 2.31 (s, 3H), 2.06 (s, 3H), 1.49 (s, 3H).

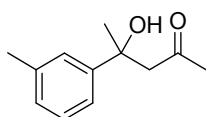

**4-hydroxy-4-(m-tolyl)pentan-2-one (7).**

Yield 169 mg, 88%; yellow oil;  $^1H$  NMR (400 MHz,  $CDCl_3$ )  $\delta$  7.22-7.03 (m, 5H), 4.52 (s, 1H), 3.19 (d,  $J = 22.8$  Hz, 1H), 2.84 (d,  $J = 22.8$  Hz, 1H), 2.36 (s, 3H), 2.08 (s, 3H), 1.51 (s, 3H);  $^{13}C$  NMR (100 MHz,  $CDCl_3$ )  $\delta$  210.6, 147.1, 137.8, 128.1, 127.4, 125.0, 121.2, 73.2, 53.9, 31.8, 30.6, 21.5; HRMS calcd for  $C_{12}H_{16}NaO_2$   $[M+Na]^+$  215.1048, found 215.1048.

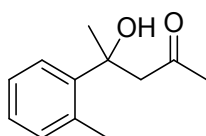

**4-hydroxy-4-(o-tolyl)pentan-2-one (8).**

Yield 159 mg, 83%; yellow oil;  $^1H$  NMR (400 MHz,  $CDCl_3$ )  $\delta$  7.51-7.30 (m, 4H), 4.48 (s, 1H), 3.17 (d,  $J = 17.2$  Hz, 1H), 2.82 (d,  $J = 17.2$  Hz, 1H), 2.31 (s, 3H), 2.07 (s, 3H), 1.49 (s, 3H);  $^{13}C$  NMR (100 MHz,  $CDCl_3$ )  $\delta$  210.9, 144.0, 135.2, 133.0, 127.2, 125.9, 125.4, 74.8, 53.2, 31.8, 29.1, 22.5; HRMS calcd for  $C_{12}H_{16}NaO_2$   $[M+Na]^+$  215.1048, found 215.1045.

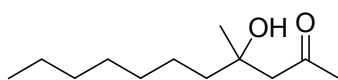

**4-hydroxy-4-methylundecan-2-one (9).**

Yield 168 mg, 84%; yellow oil;  $^1H$  NMR (400 MHz,  $CDCl_3$ )  $\delta$  3.80 (s, 1H), 2.65 (d,  $J = 17.2$  Hz, 1H), 2.57 (d,  $J = 17.2$  Hz, 1H), 2.18 (s, 3H), 1.57-1.04 (m, 15H), 0.88 (s, 3H).  $^{13}C$  NMR (100 MHz,  $CDCl_3$ )  $\delta$  221.1, 71.5, 62.8, 42.1, 31.8, 30.0, 29.2, 26.6, 23.9, 22.5, 14.0; HRMS calcd for  $C_{12}H_{24}NaO_2$   $[M+Na]^+$  223.1674, found 223.1676.

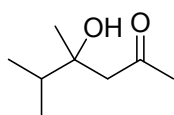

**4-hydroxy-4,5-dimethylhexan-2-one (10)<sup>3</sup>.**

Yield 115 mg, 80%; yellow oil;  $^1H$  NMR (400 MHz,  $CDCl_3$ )  $\delta$  4.40 (s, 1H), 3.28 (d,  $J = 16.8$  Hz, 1H), 2.87 (d,  $J = 16.8$  Hz, 1H), 2.16 (s, 3H), 1.93-1.84 (m, 1H), 0.93-0.91 (d,  $J = 7.2$  Hz, 3H), 0.78-0.76 (d,  $J = 6.8$  Hz, 3H).

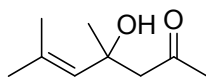

**4-hydroxy-4,6-dimethylhept-5-en-2-one (11).**

Yield 94 mg, 60%; yellow oil;  $^1H$  NMR (400 MHz,  $CDCl_3$ )  $\delta$  5.28(s, 1H), 4.21(s, 1H), 3.41 (d,  $J = 17.2$  Hz, 1H), 3.13 (d,  $J = 17.2$  Hz, 1H), 2.58 (s, 3H), 2.08 (s, 3H), 2.58 (s, 3H), 1.91 (s, 3H), 1.45 (s, 3H);  $^{13}C$  NMR (100 MHz,  $CDCl_3$ )  $\delta$  209.6, 133.3,

129.1, 70.7, 53.5, 30.7, 27.7, 26.4, 17.7; HRMS calcd for C<sub>9</sub>H<sub>16</sub>NaO<sub>2</sub> [M+Na]<sup>+</sup> 179.1048, found 179.1043.

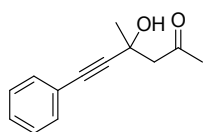

**4-hydroxy-4-methyl-6-phenylhex-5-yn-2-one (12)**<sup>4</sup>. Yield 163 mg, 81%; yellow oil; <sup>1</sup>H NMR (400 MHz, CDCl<sub>3</sub>) δ 7.40 - 7.26 (m, 5H), 4.54 (s, 1H), 3.09 (d, *J* = 16.8 Hz, 1H), 2.74 (d, *J* = 16.8 Hz, 1H), 2.26 (s, 3H), 1.59 (s, 3H).

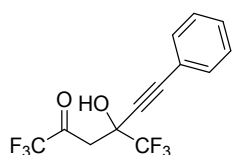

**1,1,1-trifluoro-4-hydroxy-6-phenyl-4-(trifluoromethyl)hex-5-yn-2-one (13)**. Yield 245 mg, 79%; <sup>1</sup>H NMR (400 MHz, CDCl<sub>3</sub>) δ 7.55-7.33 (m, 5H), 3.72 (s, 1H), 3.41 (d, *J* = 17.8 Hz, 1H), 3.35 (d, *J* = 17.8 Hz, 1H); <sup>13</sup>C NMR (100 MHz, CDCl<sub>3</sub>): δ 187.0, 132.1, 129.8, 128.5, 124.2, 121.4, 120.3, 88.6, 81.0, 69.4, 69.0, 41.4; HRMS calcd for C<sub>13</sub>H<sub>8</sub>F<sub>6</sub>O<sub>2</sub> [M]<sup>+</sup> 310.0428, found 310.0422.

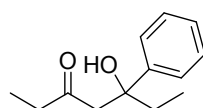

**5-hydroxy-5-phenylheptan-3-one (14)**. Yield 198 mg, 96%; yellow oil; <sup>1</sup>H NMR (400 MHz, CDCl<sub>3</sub>) δ 7.38-7.19 (m, 5H), 4.68 (s, 1H), 3.17 (d, *J* = 16.8 Hz, 1H), 2.79 (d, *J* = 16.8 Hz, 1H), 2.44-2.17 (m, 2H), 1.84- 1.72 (m, 2H), 0.92-0.84 (m, 3H), 0.76-0.72 (m, 3H); <sup>13</sup>C NMR (100 MHz, CDCl<sub>3</sub>) δ 213.7, 145.6, 128.1, 126.5, 124.9, 75.8, 51.5, 38.0, 35.8, 29.7, 7.6, 7.2; HRMS calcd for C<sub>13</sub>H<sub>18</sub>NaO<sub>2</sub> [M+Na]<sup>+</sup> 229.1204, found 229.1196.

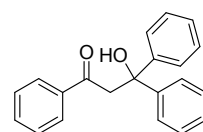

**3-hydroxy-1,3,3-triphenylpropan-1-one (15)**<sup>5</sup>. Yield 278 mg, 92%; white solid, mp 85.2-85.8 °C; <sup>1</sup>H NMR (400 MHz, CDCl<sub>3</sub>) δ 7.94-7.18 (m, 15H), 5.46 (s, 1H), 3.92 (s, 2H).

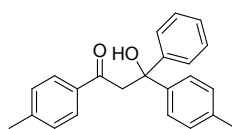

**3-hydroxy-3-phenyl-1,3-di-p-tolylpropan-1-one (16)**. Yield 294 mg, 89%; yellow oil; <sup>1</sup>H NMR (400 MHz, CDCl<sub>3</sub>) δ 7.85-7.07 (m, 13H), 5.52 (s, 1H), 3.90 (d, *J* = 17.8 Hz, 1H), 3.84 (d, *J* = 17.8 Hz, 1H), 2.43 (s, 3H), 2.28 (s, 3H); <sup>13</sup>C NMR (100 MHz, CDCl<sub>3</sub>) δ 201.0, 147.1, 137.1, 132.4, 128.3, 127.9, 127.0, 125.7, 73.2, 51.7, 21.1, 20.2; HRMS calcd for C<sub>23</sub>H<sub>22</sub>NaO<sub>2</sub> [M+Na]<sup>+</sup> 353.1517, found 353.1520.

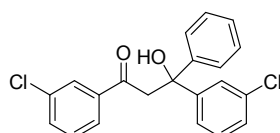

**3-hydroxy-3-phenyl-1,3-di-p-tolylpropan-1-one (17)**. Yield 344 mg, 93%; yellow oil; <sup>1</sup>H NMR (400 MHz, CDCl<sub>3</sub>) δ 7.89-7.09 (m, 13H), 5.25 (s, 1H), 3.93 (d, *J* = 17.8 Hz, 1H), 3.82 (d, *J* = 17.8 Hz, 1H); <sup>13</sup>C NMR (100 MHz, CDCl<sub>3</sub>) δ 199.3, 148.4, 145.5, 138.1, 135.2, 134.4, 133.9, 130.2, 129.9, 128.4, 128.2, 127.6, 127.3, 126.4, 126.1, 125.6, 123.8, 48.3; HRMS calcd for C<sub>21</sub>H<sub>16</sub>Cl<sub>2</sub>NaO<sub>2</sub> [M+Na]<sup>+</sup> 393.0425, found 393.0424.

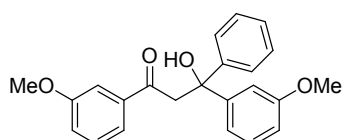

**3-hydroxy-1,3-bis(3-methoxyphenyl)-3-phenylpropan-1-one (18)**. Yield 333 mg, 92%; yellow solid, mp 103.6-

105 °C;  $^1\text{H}$  NMR (400 MHz,  $\text{CDCl}_3$ )  $\delta$  7.53-6.95 (m, 13H), 5.44 (s, 1H), 3.92 (d,  $J$  = 18.0 Hz, 1H), 3.86 (d,  $J$  = 18.0 Hz, 1H), 3.80-3.45 (m, 6H);  $^{13}\text{C}$  NMR (100 MHz,  $\text{CDCl}_3$ )  $\delta$  200.7, 159.8, 159.5, 148.1, 146.2, 137.9, 129.7, 129.1, 128.1, 128.0, 126.9, 125.6, 120.6, 120.3, 118.2, 117.9, 112.1, 112.1, 111.7, 55.3, 55.0; HRMS calcd for  $\text{C}_{23}\text{H}_{22}\text{NaO}_4$   $[\text{M}+\text{Na}]^+$  385.1416, found 385.1415.

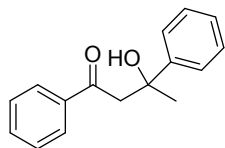

**3-hydroxy-1,3-diphenylbutan-1-one (19)**<sup>6</sup>. Yield 214 mg, 89%; pale yellow oil;  $^1\text{H}$  NMR (400 MHz,  $\text{CDCl}_3$ )  $\delta$  7.91-7.20 (m, 10H), 4.87 (s, 1H), 3.79 (d,  $J$  = 17.6 Hz, 1H), 3.34 (d,  $J$  = 17.2 Hz, 1H), 1.62 (s, 3H).

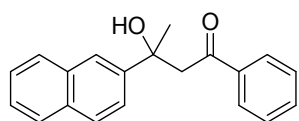

**3-hydroxy-3-(naphthalen-2-yl)-1-phenylbutan-1-one (20)**. Yield 264 mg, 91%; yellow oil;  $^1\text{H}$  NMR (400 MHz,  $\text{CDCl}_3$ )  $\delta$  7.97-7.25 (m, 12H), 5.08 (s, 1H), 3.90 (d,  $J$  = 17.4 Hz, 1H), 3.43 (d,  $J$  = 17.4 Hz, 1H), 1.70 (s, 3H);  $^{13}\text{C}$  NMR (100 MHz,  $\text{CDCl}_3$ )  $\delta$  200.2, 144.9, 133.7, 128.7, 128.0, 127.4, 126.0, 125.7, 123.0, 73.8, 48.6, 30.9; HRMS calcd for  $\text{C}_{20}\text{H}_{17}\text{O}$   $[\text{M}-\text{H}_2\text{O}+\text{H}]^+$  273.1274, found 273.1277.

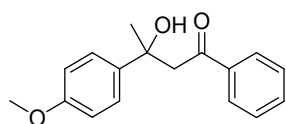

**3-hydroxy-3-(4-methoxyphenyl)-1-phenylbutan-1-one (21)**. Yield 243 mg, 90%; yellow oil;  $^1\text{H}$  NMR (400 MHz,  $\text{CDCl}_3$ )  $\delta$  7.91-6.83 (m, 9H), 4.86 (s, 1H), 3.77 (s, 3H), 3.76 (d,  $J$  = 17.4 Hz, 1H), 3.31 (d,  $J$  = 17.4 Hz, 1H), 1.60 (s, 3H);  $^{13}\text{C}$  NMR (100 MHz,  $\text{CDCl}_3$ )  $\delta$  201.4, 158.2, 139.6, 136.8, 133.7, 128.6, 128.0, 125.5, 113.5, 73.3, 55.1, 48.7, 30.9; HRMS calcd for  $\text{C}_{17}\text{H}_{18}\text{NaO}_3$   $[\text{M}+\text{Na}]^+$  293.1154, found 293.1145.

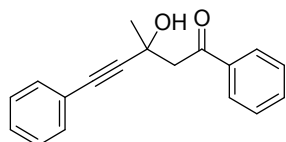

**3-hydroxy-3-methyl-1,5-diphenylpent-4-yn-1-one (22)**. Yield 211 mg, 80%; pale yellow solid, mp 45.2-46.1 °C;  $^1\text{H}$  NMR (400 MHz,  $\text{CDCl}_3$ )  $\delta$  8.00-7.22 (m, 10H), 4.88 (s, 1H), 3.73 (d,  $J$  = 17.0 Hz, 1H), 3.17 (d,  $J$  = 17.0 Hz, 1H), 1.71 (s, 3H);  $^{13}\text{C}$  NMR (100 MHz,  $\text{CDCl}_3$ )  $\delta$  200.3, 136.8, 133.8, 131.6, 128.7, 128.2, 128.0, 122.5, 91.9, 82.9, 66.2, 49.2, 29.9, 29.6; HRMS calcd for  $\text{C}_{18}\text{H}_{16}\text{NaO}_2$   $[\text{M}+\text{Na}]^+$  287.1048, found 287.1040.

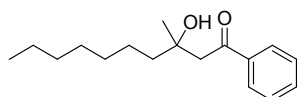

**3-hydroxy-3-methyl-1-phenyldecane-1-one (23)**. Yield 223 mg, 85%; yellow oil;  $^1\text{H}$  NMR (400 MHz,  $\text{CDCl}_3$ )  $\delta$  7.96-7.19 (m, 5H), 4.52 (s, 1H), 3.20 (d,  $J$  = 16.8 Hz, 1H), 2.83 (d,  $J$  = 16.8 Hz, 1H), 1.78-1.18 (m, 12H), 0.88-0.82 (m, 3H);  $^{13}\text{C}$  NMR (100 MHz,  $\text{CDCl}_3$ )  $\delta$  202.1, 137.4, 133.5, 128.7, 128.1, 124.8, 72.0, 46.9, 42.4, 31.8, 30.1, 29.3, 27.0, 24.1, 22.6, 14.1; HRMS calcd for  $\text{C}_{17}\text{H}_{26}\text{NaO}_2$   $[\text{M}+\text{Na}]^+$  285.1830, found 285.1837.

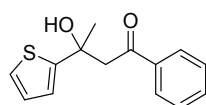

**3-hydroxy-1-phenyl-3-(thiophen-2-yl)butan-1-one (24)**. Yield 214 mg, 87%; yellow oil;  $^1\text{H}$  NMR (400 MHz,  $\text{CDCl}_3$ )  $\delta$  7.92-7.07 (m, 8H), 4.99 (s, 1H), 3.70 (d,  $J$  = 17.2 Hz, 1H), 3.32 (d,  $J$  = 17.2 Hz, 1H), 1.63 (s, 3H);  $^{13}\text{C}$  NMR (100 MHz,  $\text{CDCl}_3$ )  $\delta$  201.3, 149.3, 136.9, 133.7,

128.6, 128.0, 125.8, 125.1, 119.3, 72.4, 48.7, 30.4; HRMS calcd for C<sub>14</sub>H<sub>14</sub>NaO<sub>2</sub>S [M+Na]<sup>+</sup> 269.0612, found 269.0608.

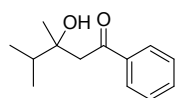

**3-hydroxy-3,4-dimethyl-1-phenylpentan-1-one (25)**<sup>7</sup>. Yield 165 mg, 80%; yellow oil; <sup>1</sup>H NMR (400 MHz, CDCl<sub>3</sub>) δ 7.37-7.19 (m, 5H), 4.49 (s, 1H), 3.31 (d, *J* = 16.6 Hz, 1H), 2.82 (d, *J* = 16.6 Hz, 1H), 3.05 (s, 3H), 1.93-1.88 (m, 1H), 0.95-0.90 (m, 3H), 0.76-0.75 (m, 3H).

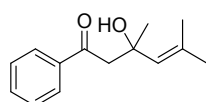

**3-hydroxy-3,5-dimethyl-1-phenylhex-4-en-1-one (26)**<sup>8</sup>. Yield 188 mg, 86%; yellow oil; <sup>1</sup>H NMR (400 MHz, CDCl<sub>3</sub>) δ 7.96-7.21 (m, 5H), 5.28 (s, 1H), 4.21 (s, 1H), 3.41 (d, *J* = 17.2 Hz, 1H), 3.12 (d, *J* = 17.2 Hz, 1H), 2.08 (s, 3H), 1.89 (s, 3H), 1.44 (s, 3H).

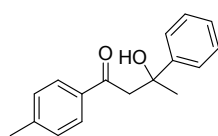

**3-hydroxy-3-phenyl-1-(*p*-tolyl)butan-1-one (27)**. Yield 220 mg, 87%; yellow needle, 51.2-52.8 °C; <sup>1</sup>H NMR (400 MHz, CDCl<sub>3</sub>) δ 7.81-7.09 (m, 9H), 4.98 (s, 1H), 3.76 (d, *J* = 17.4 Hz, 1H), 3.31 (d, *J* = 17.4 Hz, 1H), 2.40 (s, 3H), 1.60 (s, 3H); <sup>13</sup>C NMR (100 MHz, CDCl<sub>3</sub>) δ 201.0, 147.7, 144.7, 134.5, 129.6, 129.3, 128.2, 126.6, 124.4, 115.3, 73.6, 48.5, 30.9, 21.7; HRMS calcd for C<sub>17</sub>H<sub>18</sub>NaO<sub>2</sub> [M+Na]<sup>+</sup> 277.1204, found 277.1205.

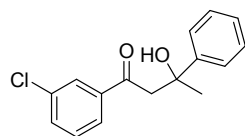

**1-(3-chlorophenyl)-3-hydroxy-3-phenylbutan-1-one (28)**. Yield 249 mg, 91%; pale yellow oil; <sup>1</sup>H NMR (400 MHz, CDCl<sub>3</sub>) δ 7.85-7.19 (m, 9H), 4.63 (s, 1H), 3.76 (d, *J* = 17.4 Hz, 1H), 3.31 (d, *J* = 17.4 Hz, 1H), 1.62 (s, 3H); <sup>13</sup>C NMR (100 MHz, CDCl<sub>3</sub>) δ 199.9, 147.3, 138.4, 135.0, 133.5, 129.9, 128.3, 126.7, 126.8, 126.1, 124.3, 73.5, 49.1, 30.8; HRMS calcd for C<sub>16</sub>H<sub>15</sub>ClNaO<sub>2</sub> [M+Na]<sup>+</sup> 297.0658, found 297.0660.

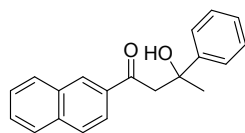

**3-hydroxy-1-(naphthalen-2-yl)-3-phenylbutan-1-one (29)**. Yield 261 mg, 90%; yellow solid, 52.2-54.2 °C; <sup>1</sup>H NMR (400 MHz, CDCl<sub>3</sub>) δ 8.49-7.25 (m, 12H), 5.02 (s, 1H), 3.99 (d, *J* = 17.0 Hz, 1H), 3.53 (d, *J* = 17.0 Hz, 1H), 1.72 (s, 3H); <sup>13</sup>C NMR (100 MHz, CDCl<sub>3</sub>) δ 201.2, 147.7, 135.8, 134.3, 132.4, 130.1, 129.6, 128.8, 128.6, 128.3, 127.8, 126.9, 126.7, 125.7, 124.4, 123.4, 73.7, 48.8, 30.9; HRMS calcd for C<sub>20</sub>H<sub>18</sub>NaO<sub>2</sub> [M+Na]<sup>+</sup> 313.1204, found 313.1200.

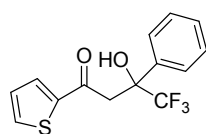

**4,4-trifluoro-3-hydroxy-3-phenyl-1-(thiophen-2-yl)butan-1-one (30)**. Yield 231 mg, 77%; dark yellow solid, 51.3-51.8 °C; <sup>1</sup>H NMR (400 MHz, CDCl<sub>3</sub>) δ 7.83-7.16 (m, 8H), 5.72 (s, 1H), 3.89 (d, *J* = 16.6 Hz, 1H), 3.60 (d, *J* = 16.6 Hz, 1H); <sup>13</sup>C NMR (100 MHz, CDCl<sub>3</sub>) δ 191.8, 143.1, 137.3, 135.9, 133.5, 128.8, 128.6, 128.4, 126.2, 40.9; HRMS calcd for C<sub>14</sub>H<sub>11</sub>F<sub>3</sub>NaO<sub>2</sub>S [M+Na]<sup>+</sup>, 323.0330, found 323.0325.

### 3. General Procedure for the preparation of 3-substituted enones.

To a solution *i*-PrMgCl (0.77 M, 0.13 mL, 0.1 mmol, 0.2 eq.) was dropwise added

cyclic 1,3-diketones (0.5 mmol, 1.0 eq.) in anhydrous THF (1 mL) at 0 °C. The mixture was stirred for 30 min at 0 °C and then the bromide Grignard reagent (1.25 mmol, 2.5 eq.) was added. The mixture was warmed to 40 °C. After stirring for 4 h at 40 °C, the reaction was quenched with 25 mL 10% aqueous solution of acetic acid at 0 °C. The aqueous layer was extracted with ether (3×15 mL) and the combined organic layer was dried with anhydrous Na<sub>2</sub>SO<sub>4</sub>. The solvent was evaporated under the reduced pressure and the crude product was purified by column chromatography.

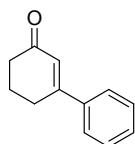

**3-phenyl-2-cyclohexene-1-one (31)**<sup>9</sup>. Yield 70.9 mg, 82%; yellow solid, 64-65 °C; <sup>1</sup>H NMR (400 MHz, CDCl<sub>3</sub>) δ 7.53-7.37 (m, 5H), 6.40 (s, 1H), 2.77-2.74 (m, 2H), 2.47-2.45 (m, 2H), 2.17-2.10 (m, 2H).

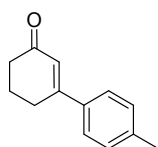

**3-(4'-methyl)phenyl-2-cyclohexene-1-one (32)**<sup>10</sup>. Yield 83.8 mg, 90%; yellow solid, 43-44 °C; <sup>1</sup>H NMR (400 MHz, CDCl<sub>3</sub>) δ 7.42-7.20 (m, 4H), 6.40 (s, 1H), 2.77-2.73 (m, 2H), 2.48-2.44 (m, 2H), 2.34 (s, 3H), 2.17-2.10 (m, 2H).

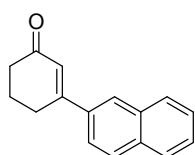

**3-(naphthalen-2-yl)cyclohex-2-enone (33)**<sup>11</sup>. Yield 98 mg, 88%; white solid, 89-90 °C; <sup>1</sup>H NMR (400 MHz, CDCl<sub>3</sub>) δ 8.01-7.51 (m, 7H), 6.58 (s, 1H), 2.92-2.89 (m, 2H), 2.55-2.52 (m, 2H), 2.24-2.18 (m, 2H).

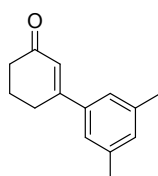

**3-(3',5'-dimethyl)phenyl-2-cyclohexene-1-one (34)**<sup>11</sup>. Yield 70 mg, 70%; yellow oil; <sup>1</sup>H NMR (400 MHz, CDCl<sub>3</sub>) δ 7.15 (s, 2H), 7.05 (s, 1H), 6.39 (s, 1H), 2.76-2.73 (m, 2H), 2.47-2.34 (m, 2H), 2.16 (s, 6H), 2.11-2.10 (m, 2H).

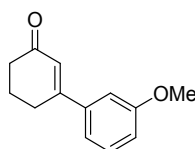

**3-(3'-methoxy)phenyl-2-cyclohexene-1-one (35)**<sup>12</sup>. Yield 79 mg, 79%; yellow oil; <sup>1</sup>H NMR (400 MHz, CDCl<sub>3</sub>) δ 7.33-6.95 (m, 4H), 6.42 (s, 1H), 3.84 (s, 3H), 2.78-2.75 (m, 2H), 2.51-2.47 (m, 2H), 2.19-2.12 (m, 2H).

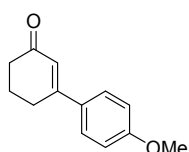

**3-(4'-methoxy)phenyl-2-cyclohexene-1-one (36)**<sup>12</sup>. Yield 85 mg, 84%; white solid, mp 84-85 °C; <sup>1</sup>H NMR (400 MHz, CDCl<sub>3</sub>) δ 7.50-6.94 (m, 4H), 6.40 (s, 1H), 3.84 (s, 3H), 2.76-2.73 (m, 2H), 2.47-2.45 (m, 2H), 2.17-2.10 (m, 2H).

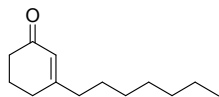

**3-heptylcyclohex-2-enone (37)**<sup>13</sup>. Yield 73 mg, 70%; yellow oil; <sup>1</sup>H NMR (400 MHz, CDCl<sub>3</sub>) δ 5.86 (s, 1H), 2.36-2.21 (m, 17H), 0.88-0.84 (m, 3H).

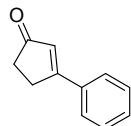

**3-(3,5-dimethylphenyl)cyclopent-2-enone (38)**<sup>14</sup>. Yield 82 mg, 76%; white solid, mp 82-83 °C; <sup>1</sup>H NMR (400 MHz, CDCl<sub>3</sub>) δ 7.69-7.44 (m, 5H), 6.59 (s, 1H), 3.08-3.05 (m, 2H), 2.61-2.59 (m, 2H).

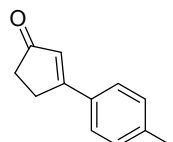

**3-(p-tolyl)cyclopent-2-enone (39)**<sup>15</sup>. Yield 67.4 mg, 78%; white solid, mp 100-101 °C; <sup>1</sup>H NMR (400 MHz, CDCl<sub>3</sub>) δ 7.58-2.26 (m, 4H), 6.55 (s, 1H), 3.06- 3.03 (m, 2H), 2.60-2.58 (m, 2H), 2.42 (s, 3H).

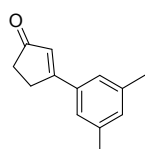

**3-(3',5'-dimethylphenyl)cyclopent-2-enone (40)**. Yield 82 mg, 76%; yellow solid, mp 93-94 °C; <sup>1</sup>H NMR (400 MHz, CDCl<sub>3</sub>) δ 7.27-7.11 (m, 3H), 6.55 (s, 1H), 3.05-3.01 (m, 2H), 2.59-2.56 (m, 2H), 2.37 (s, 6H) ; <sup>13</sup>C NMR (100 MHz, CDCl<sub>3</sub>) δ 209.5, 174.1, 138.5, 134.1, 133.1, 127.4, 124.7, 35.4, 28.8, 21.4; HRMS calcd for C<sub>13</sub>H<sub>15</sub>O [M+H]<sup>+</sup>, 187.1119, found 187.1123.

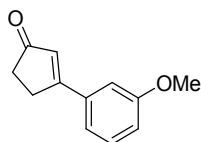

**3-(3-methoxyphenyl)cyclopent-2-enone (41)**<sup>16</sup>. Yield 68.9 mg, 73%; yellow solid, mp 95-96 °C; <sup>1</sup>H NMR (400 MHz, CDCl<sub>3</sub>) δ 7.38-7.00 (m, 4H), 6.57 (s, 1H), 3.86 (s, 3H), 3.06-3.02 (m, 2H), 2.61-2.58 (m, 2H).

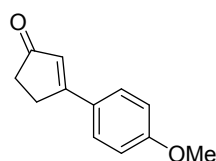

**3-(4-methoxyphenyl)cyclopent-2-enone (42)**<sup>17</sup>. Yield 68.9 mg, 73%; white solid, mp 140-141 °C; <sup>1</sup>H NMR (400 MHz, CDCl<sub>3</sub>) δ 7.64-6.95 (m, 4H), 6.48 (s, 1H), 3.87 (s, 3H), 3.04-3.01 (m, 2H), 2.59-2.56 (m, 2H).

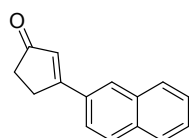

**3-(naphthalen-2-yl)cyclopent-2-enone (43)**<sup>18</sup>. Yield 76.6 mg, 74%; yellow solid, mp 126-127 °C; <sup>1</sup>H NMR (400 MHz, CDCl<sub>3</sub>) δ 8.11-7.54 (m, 7H), 6.70 (s, 1H), 3.20-3.16 (m, 2H), 2.66-2.63 (m, 2H).



## 4. NMR Spectra

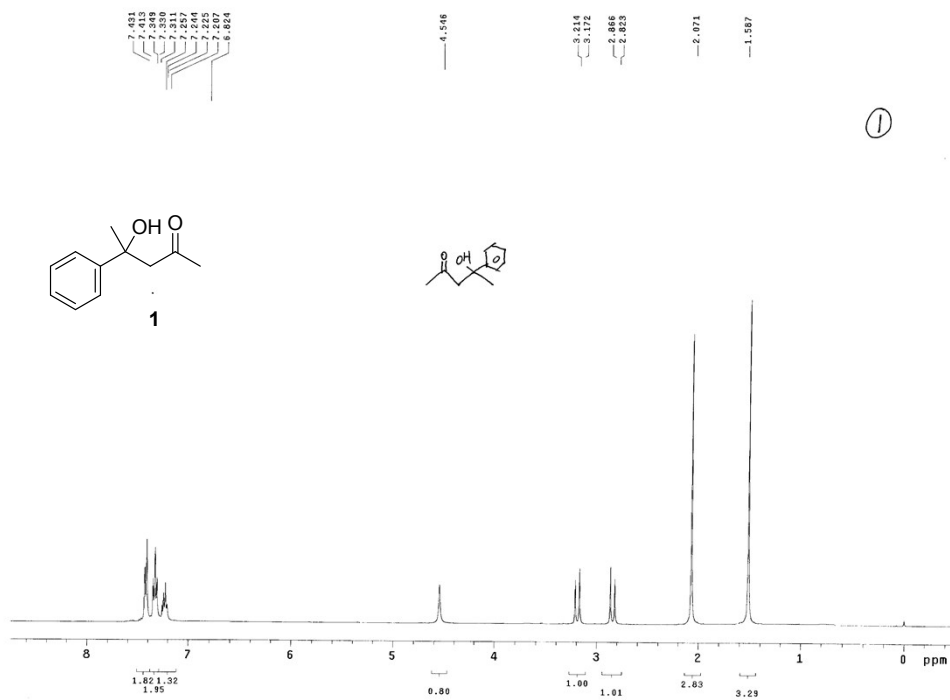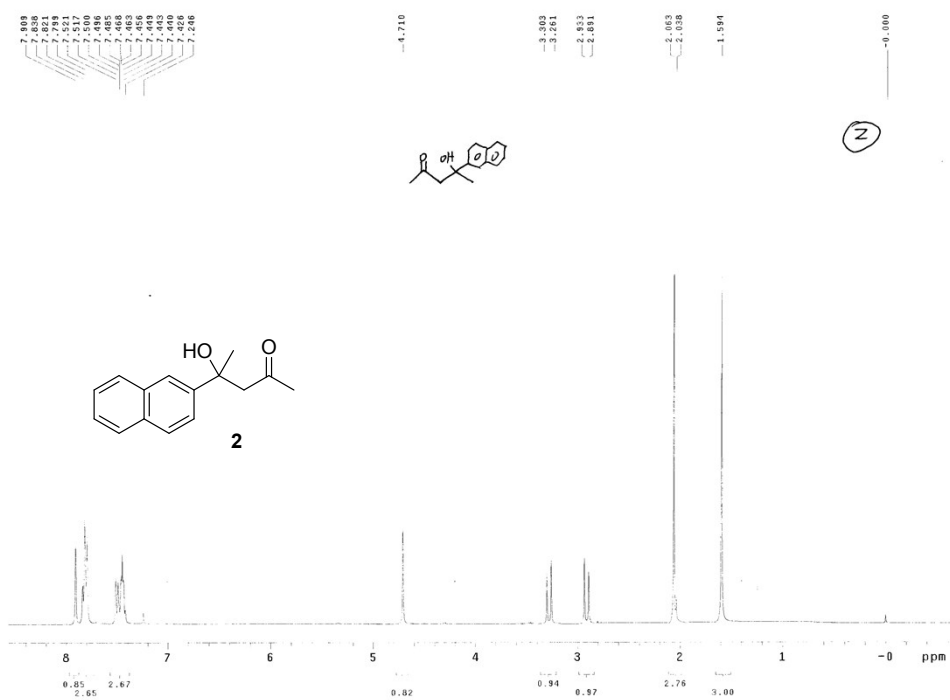

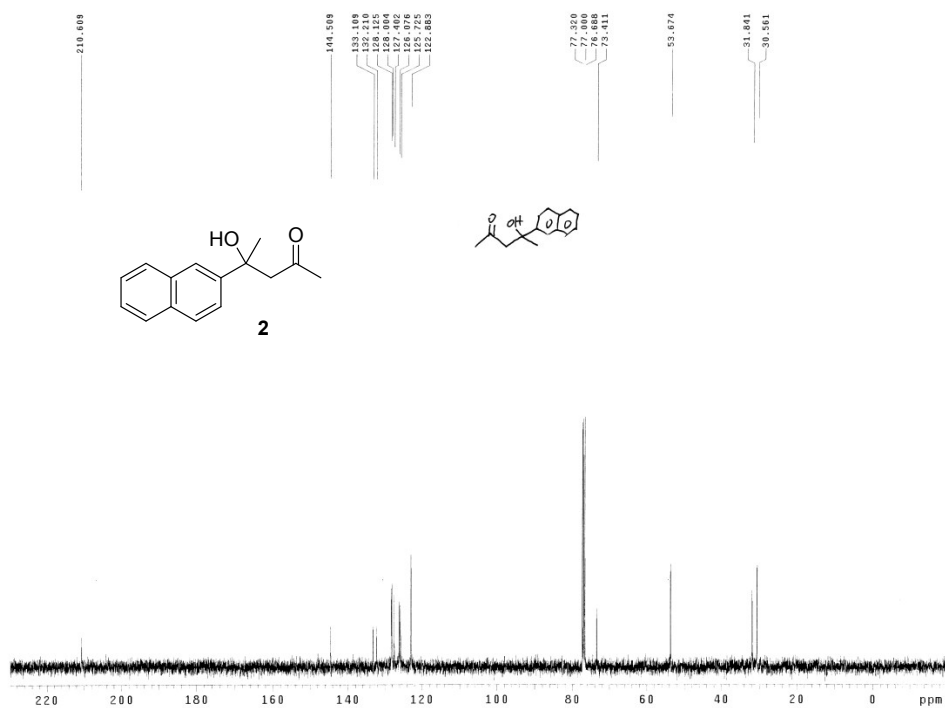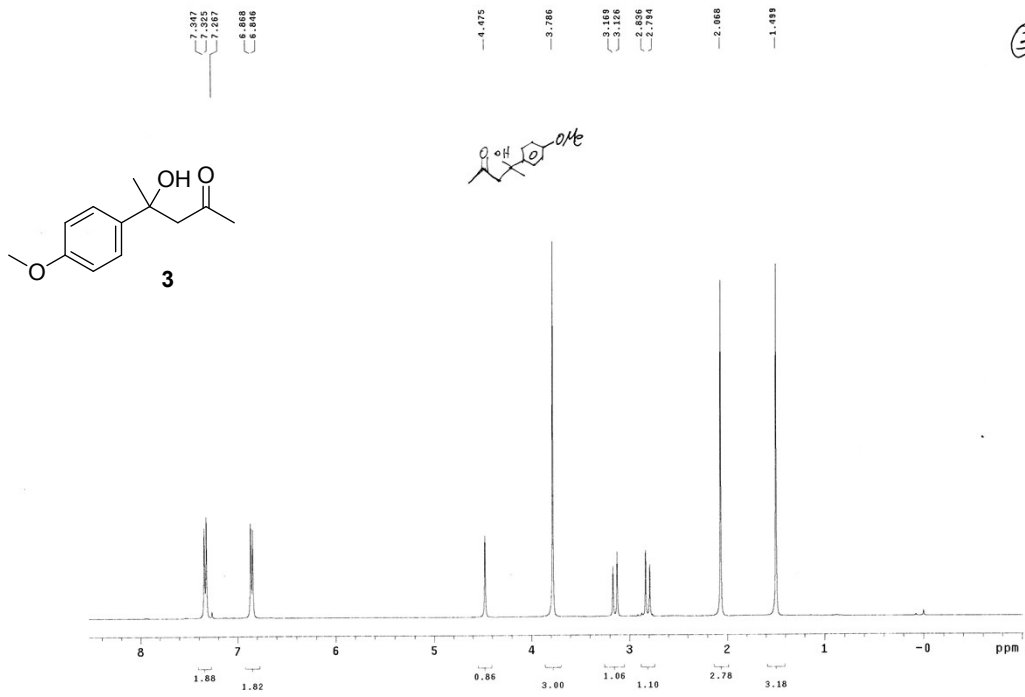

③

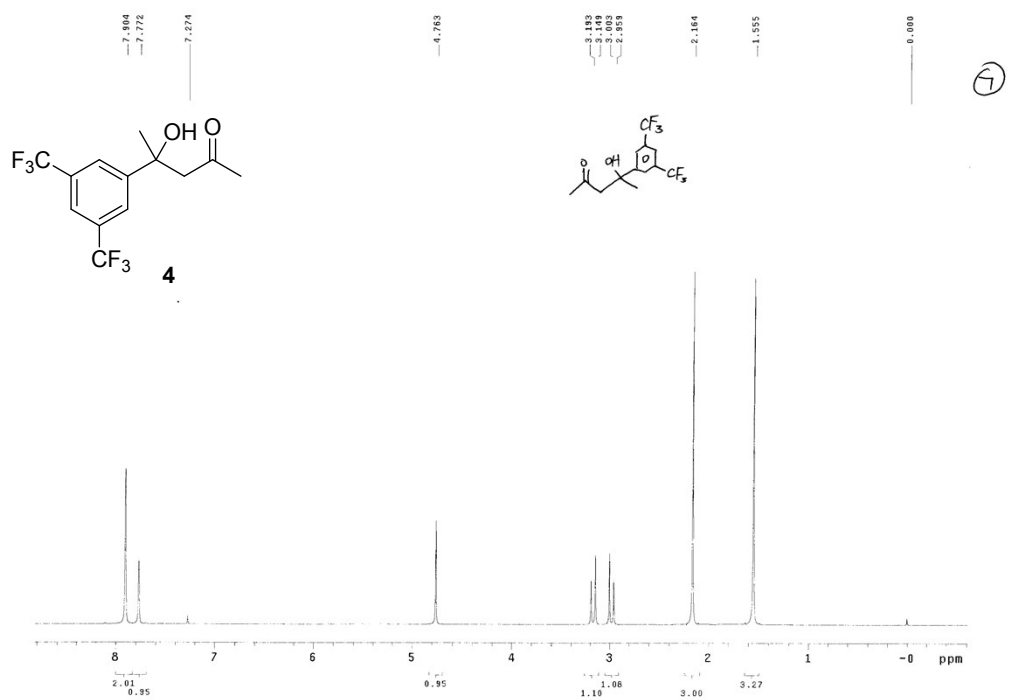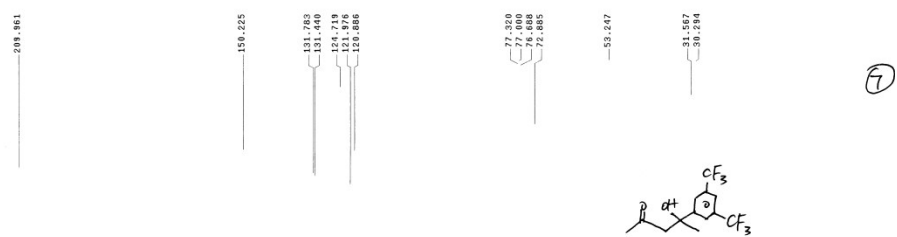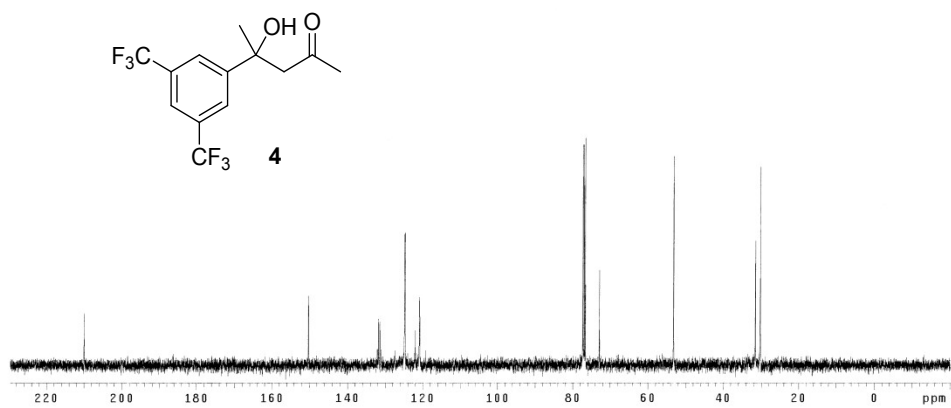

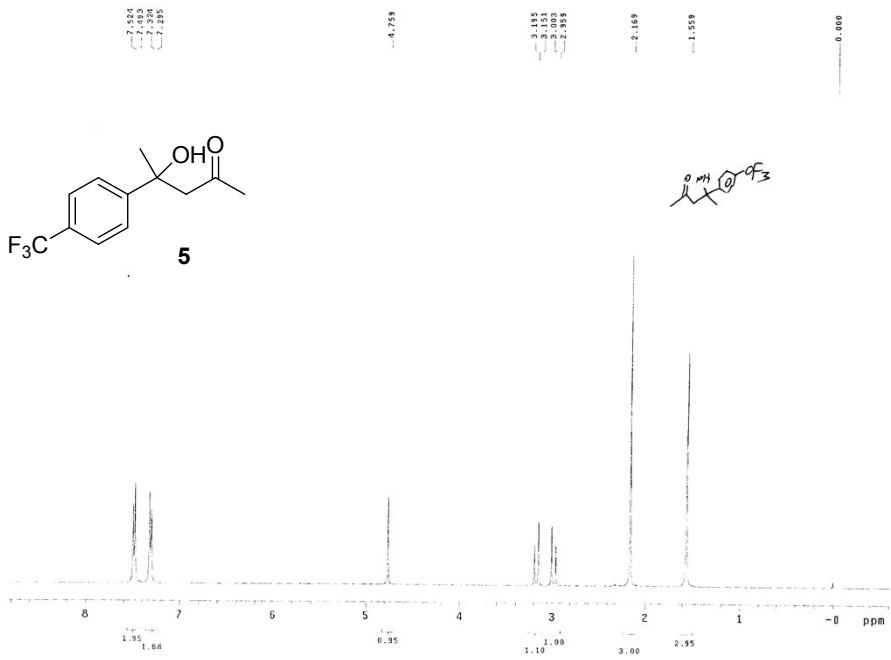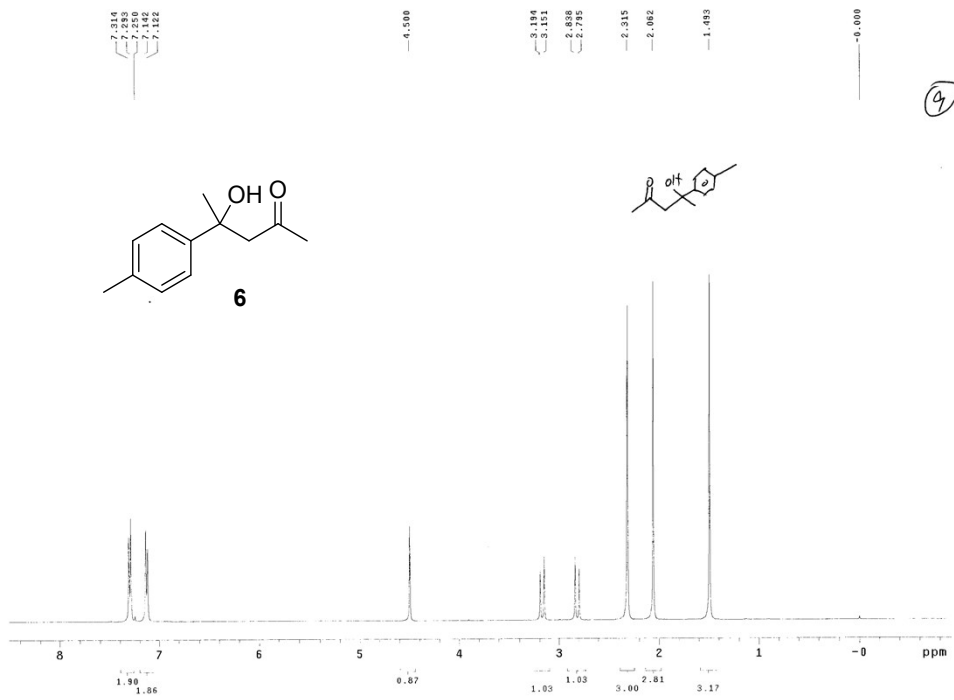

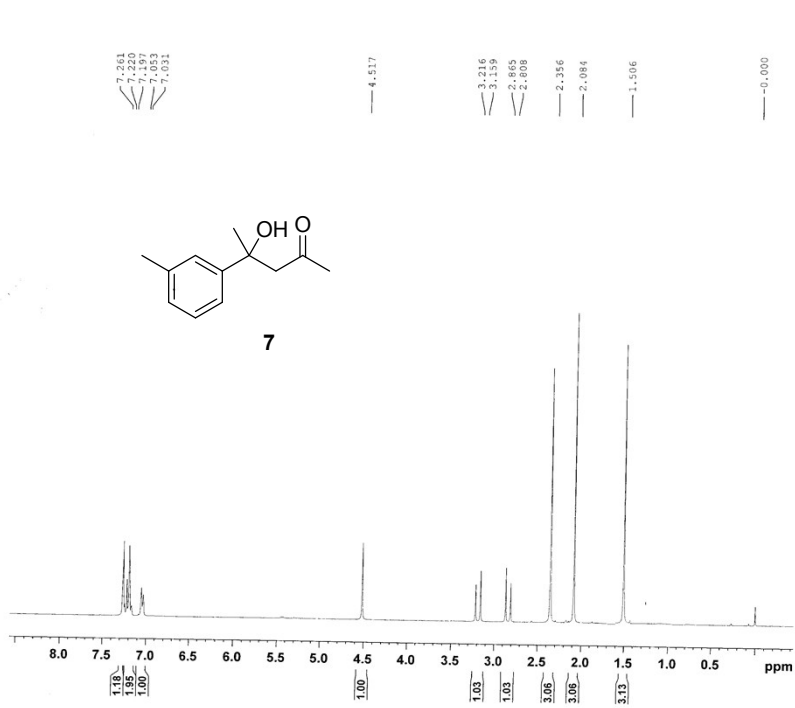

```

NAME          1411
EXPNO         1
PROCNO        1
Date_         20141114
Time          13.11
INSTRUM       spect
PROBHD        5 mm PABBO
PULPROG       zgpg30
TD            65536
SOLVENT       CDCl3
NS            2
DS            2
SWH           6188.119 Hz
FIDRES       0.094423 Hz
AQ           0.293387 sec
RG            128
DE           60.000 usec
TE            6.50 usec
DT            288.5 K
DQ            1.0000000 sec
TD0           1

===== CHANNEL f1 =====
NUC1          1H
P1            11.00 usec
PL1           0.00 dB
SFO1         11.5647796 MHz
SFOL         360.1318534 MHz
SI            32768
ZF           360.1330026 MHz
WDW           EM
SSB           0
GB            0.30 Hz
PC            1.00
  
```

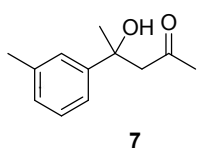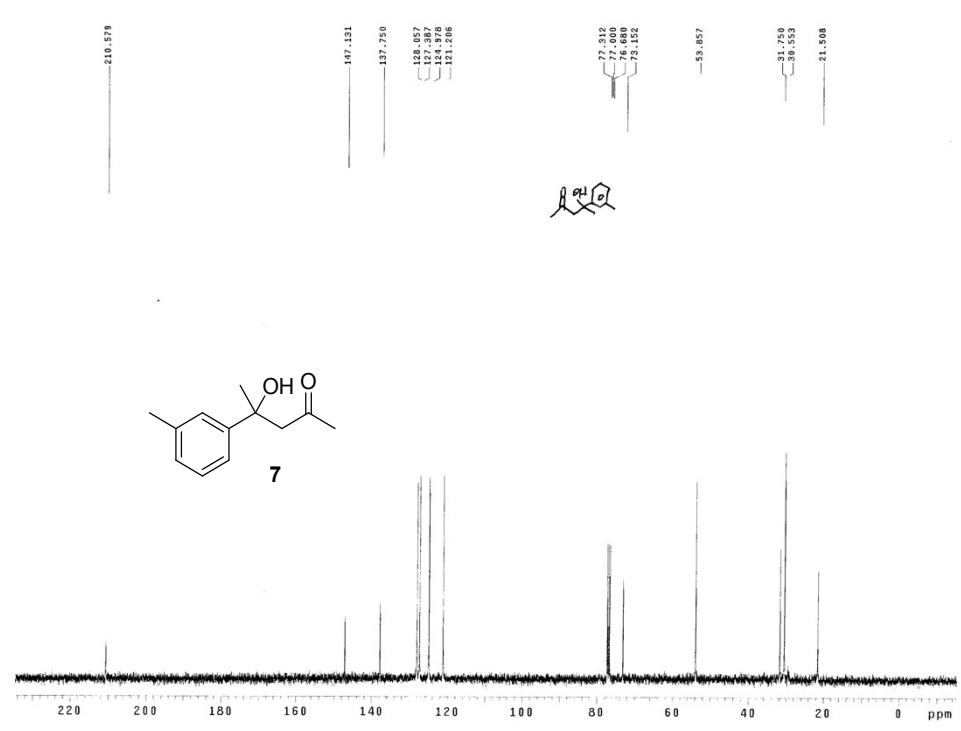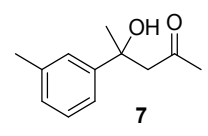

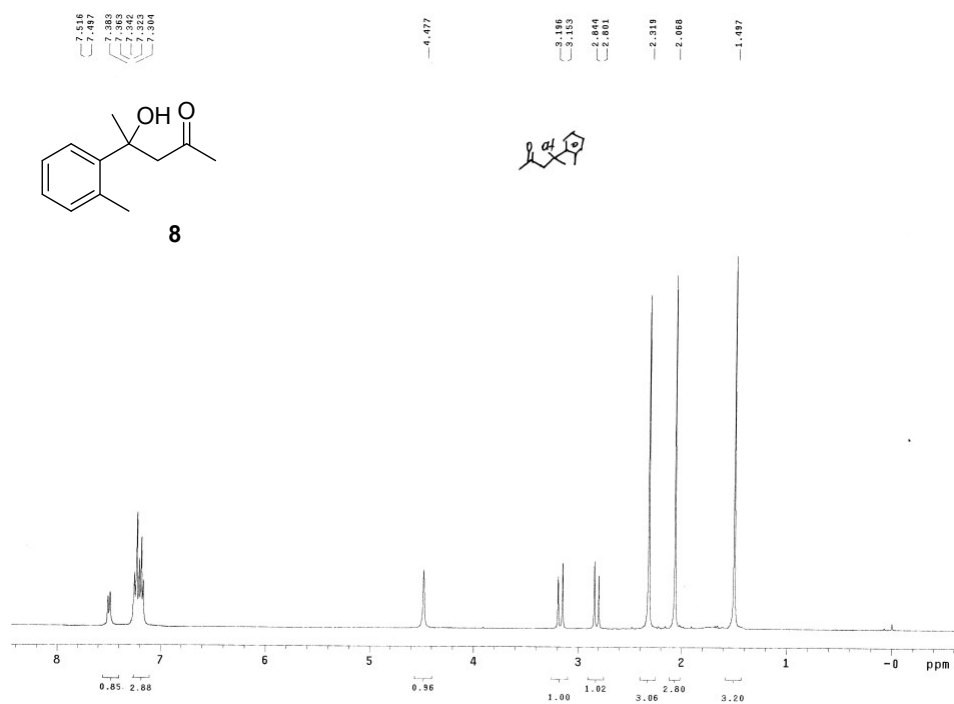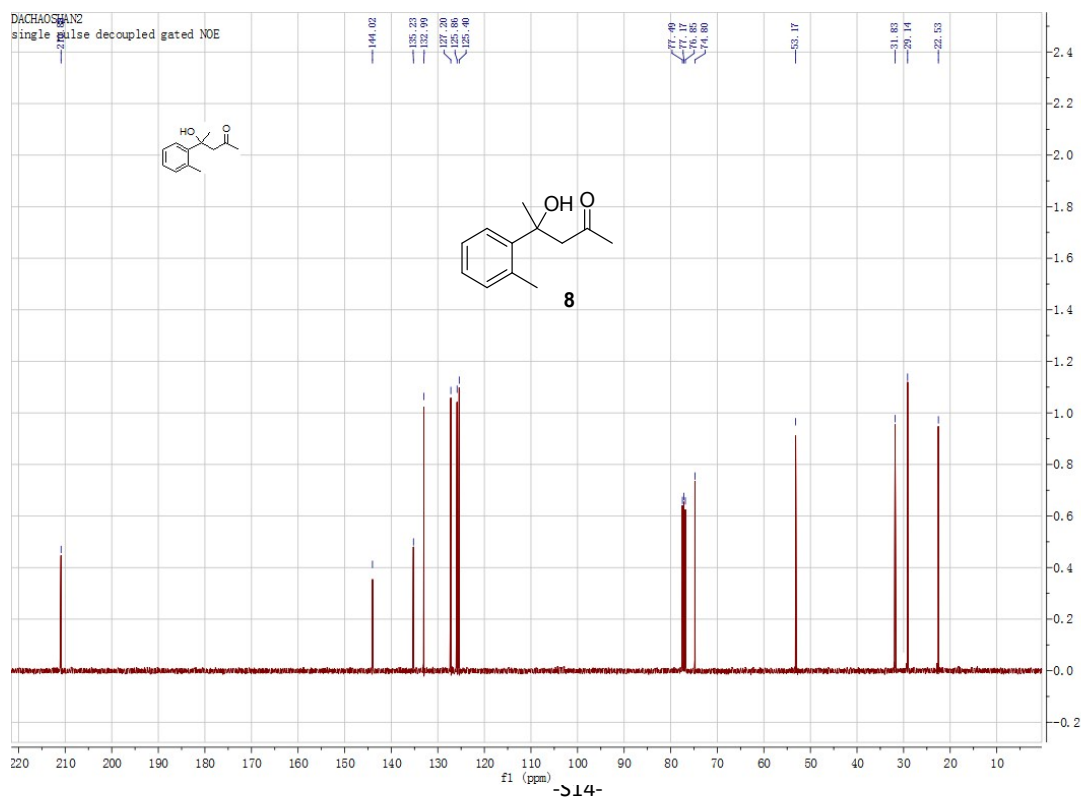

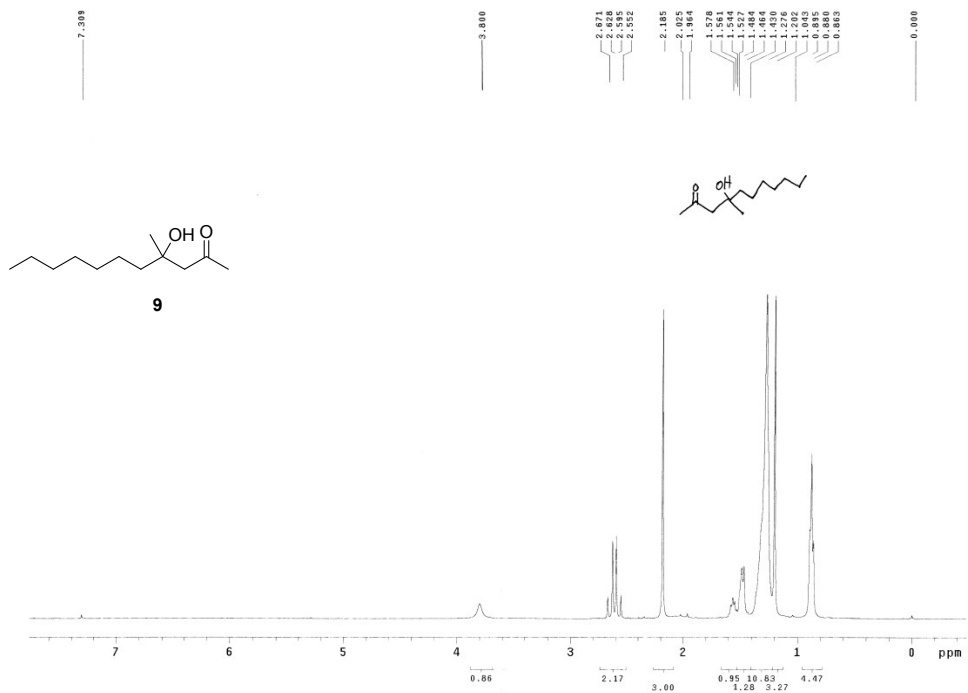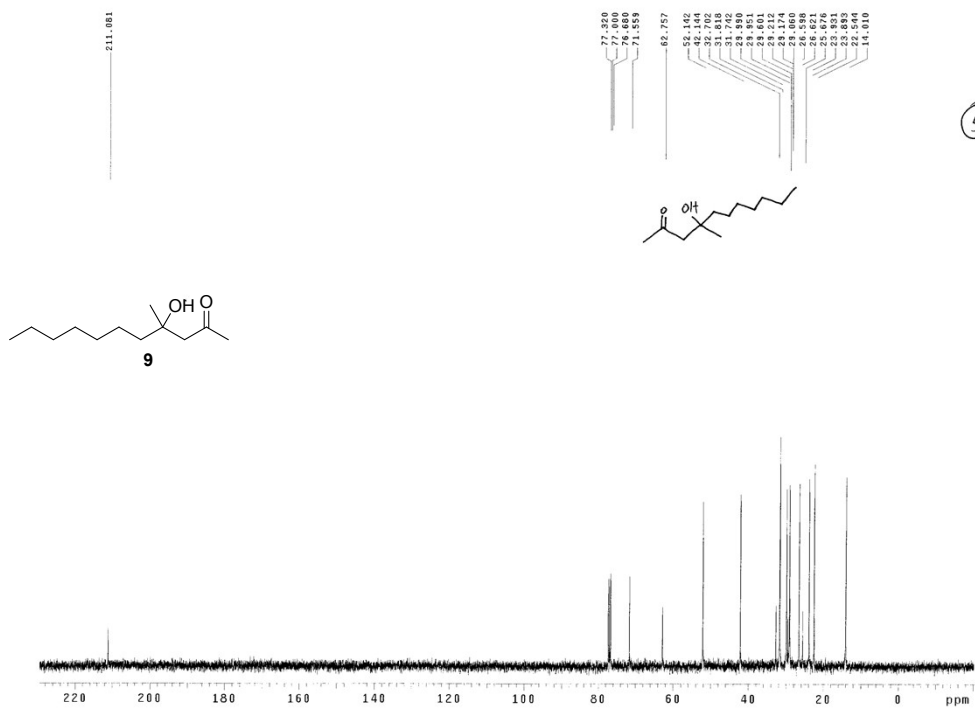

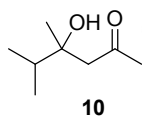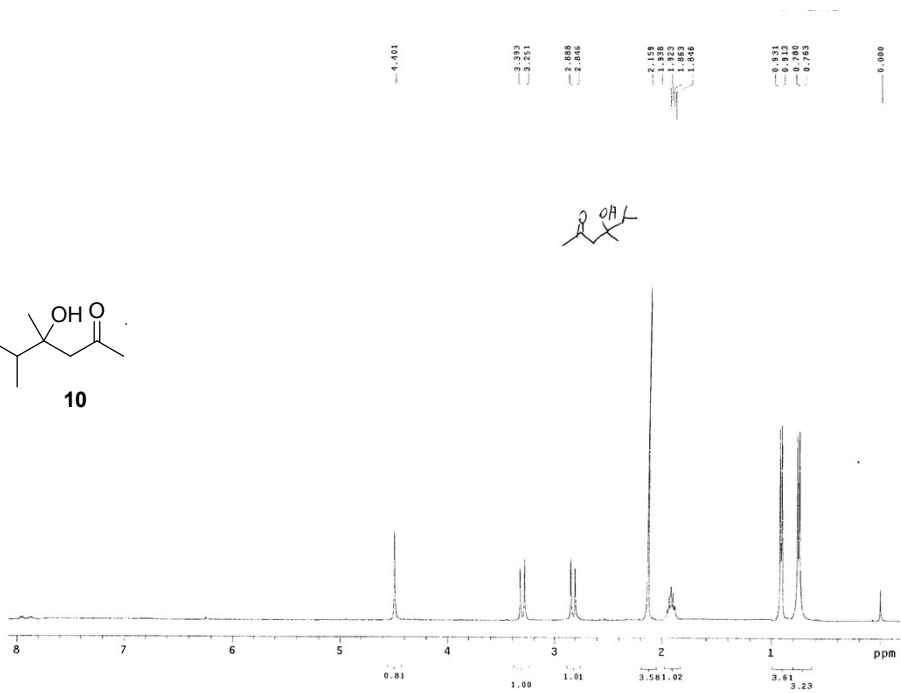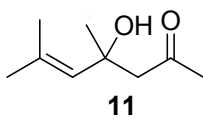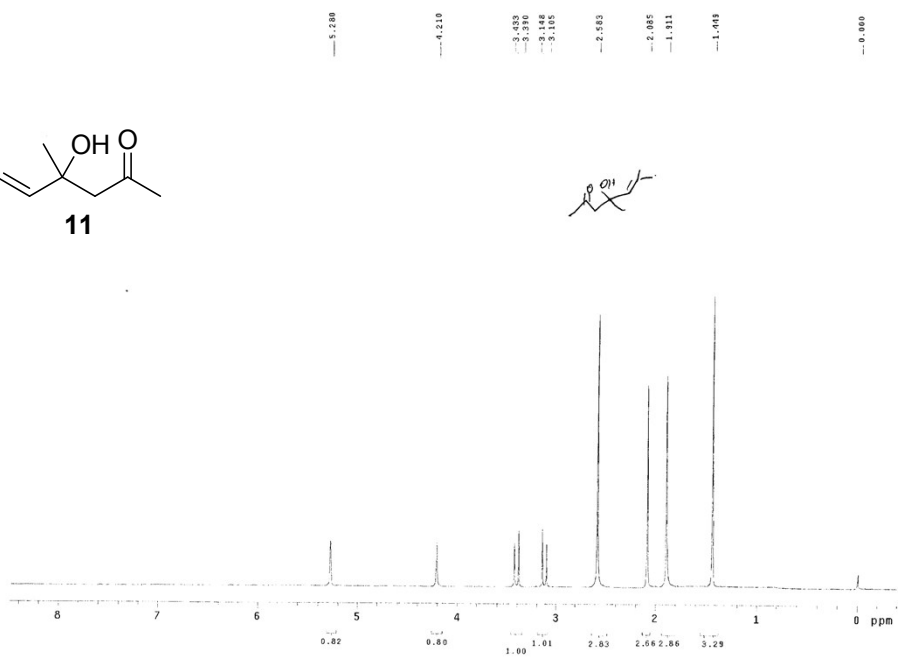



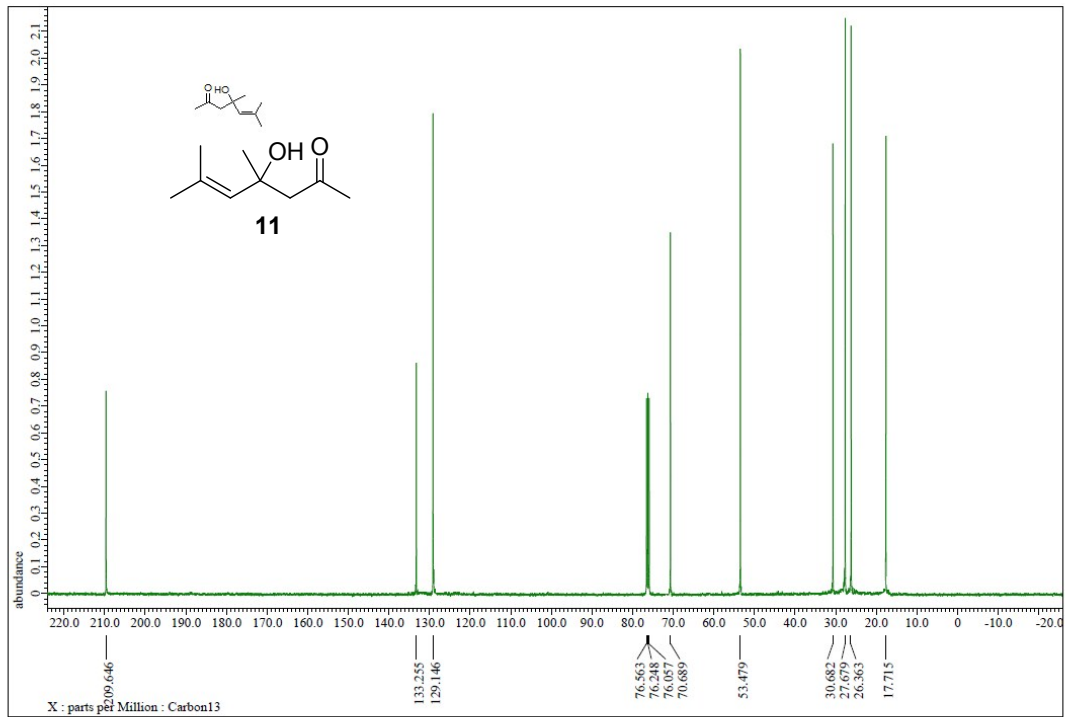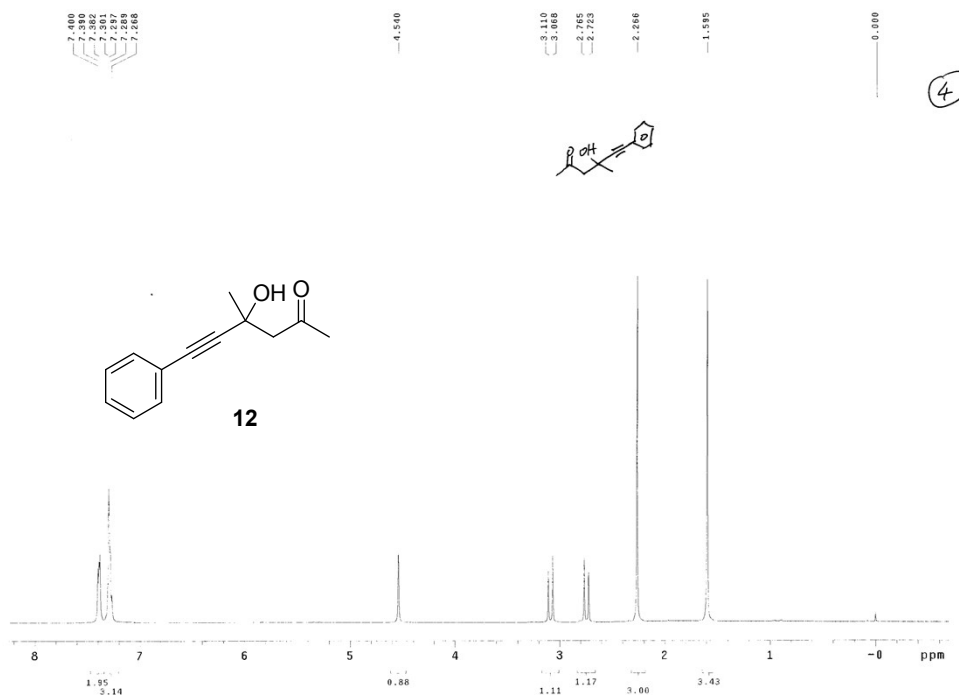

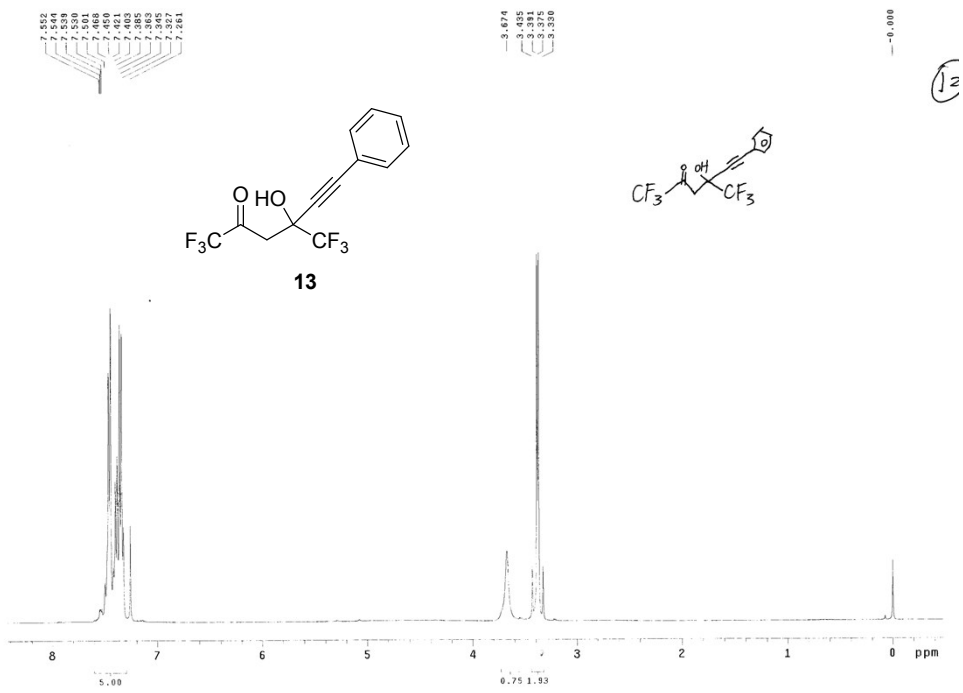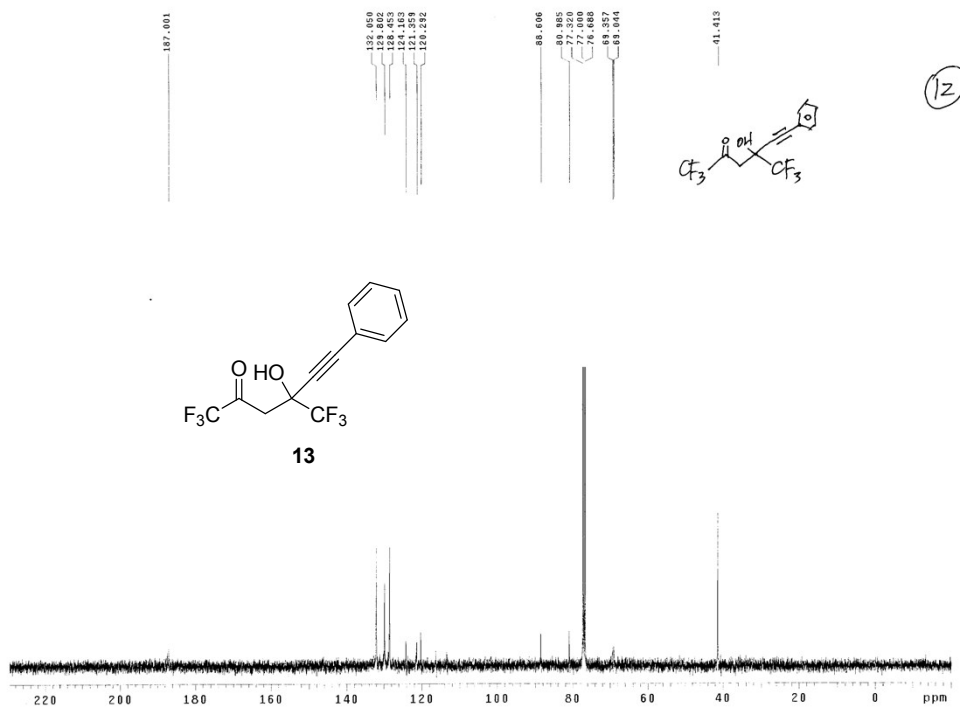

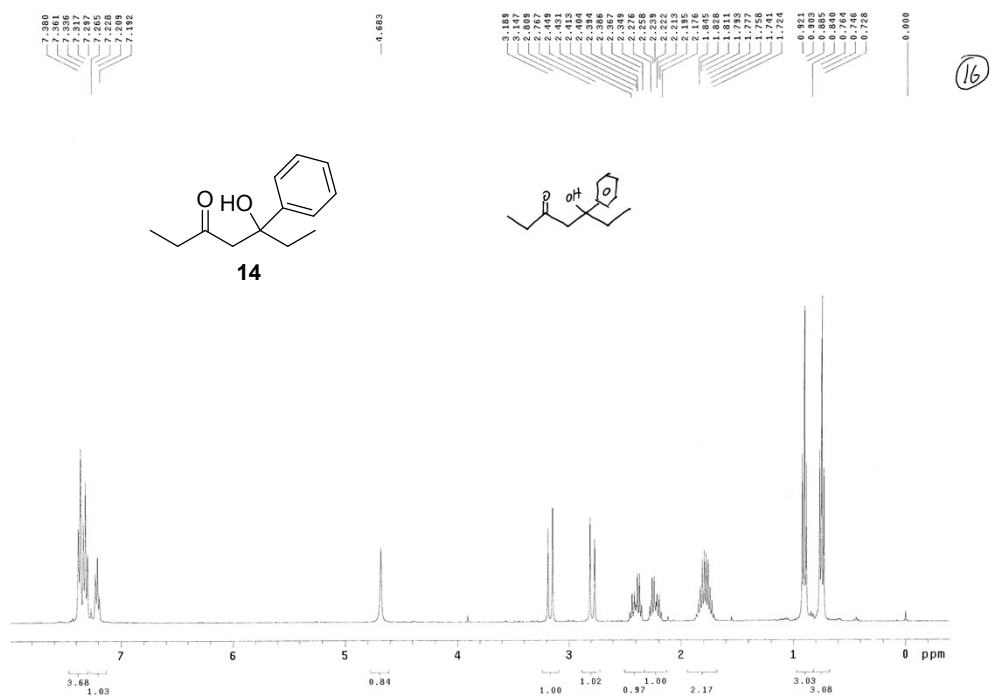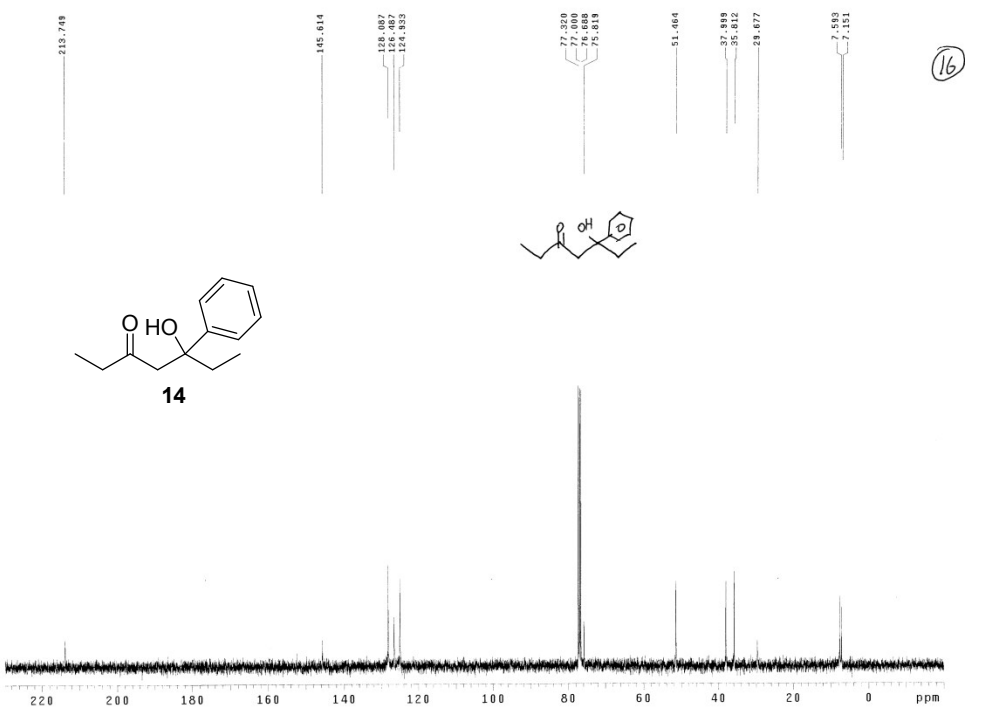

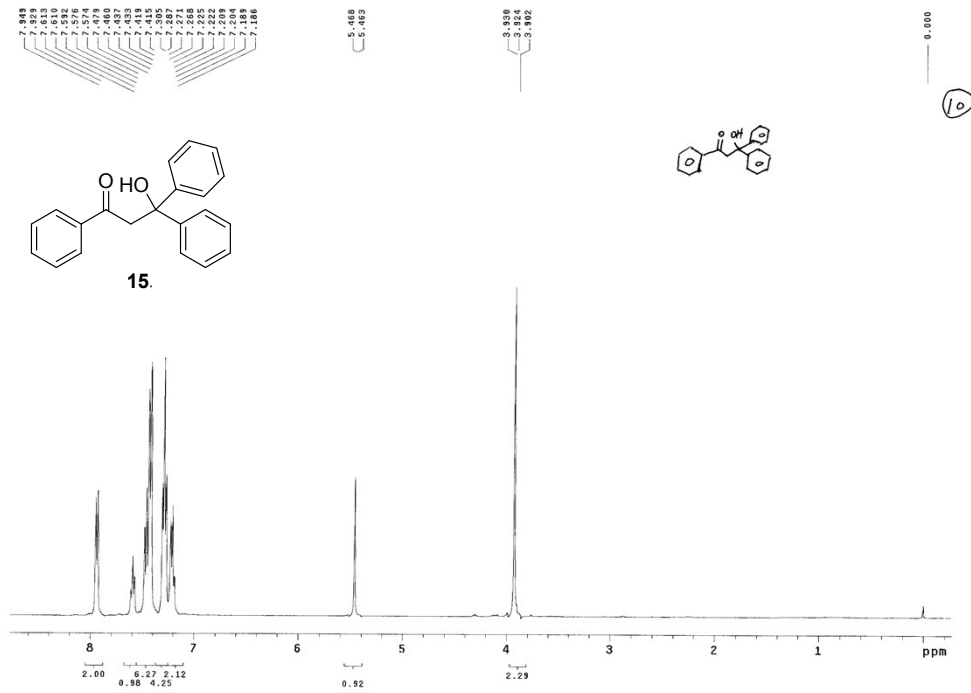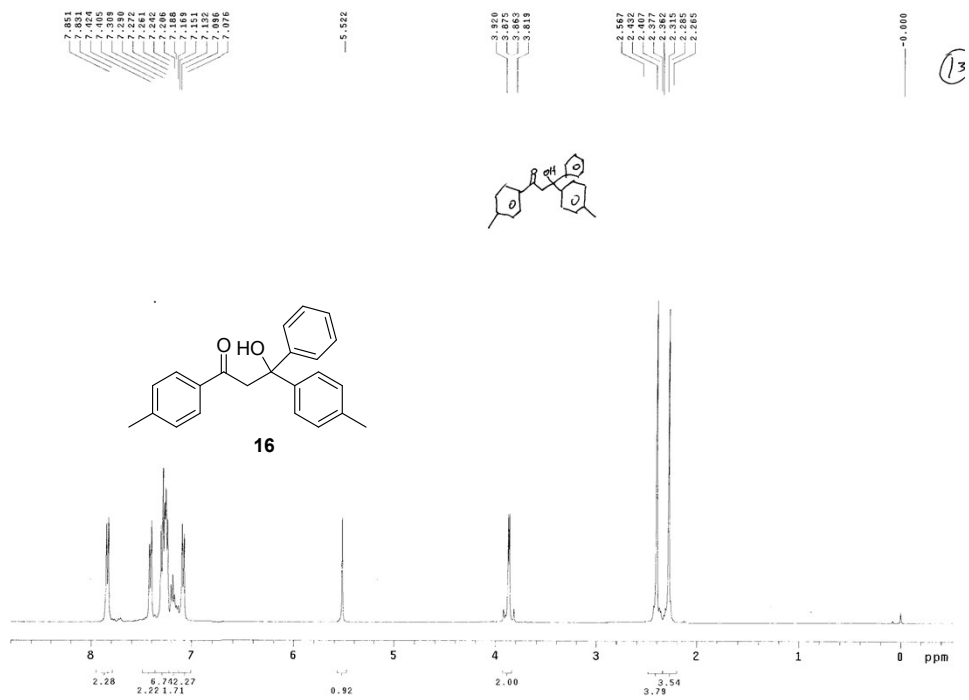

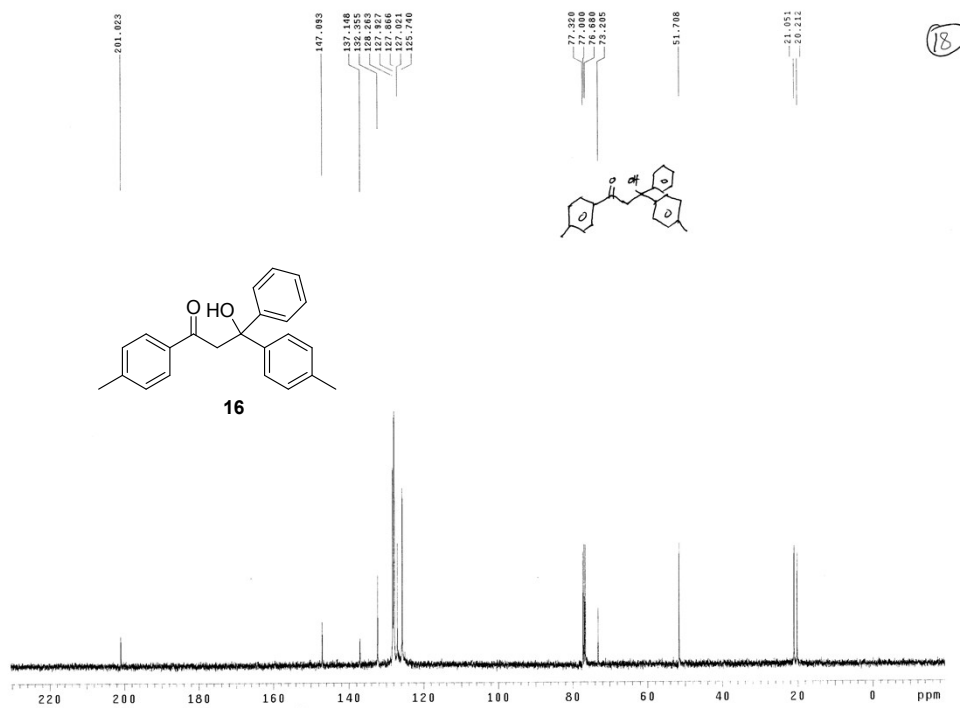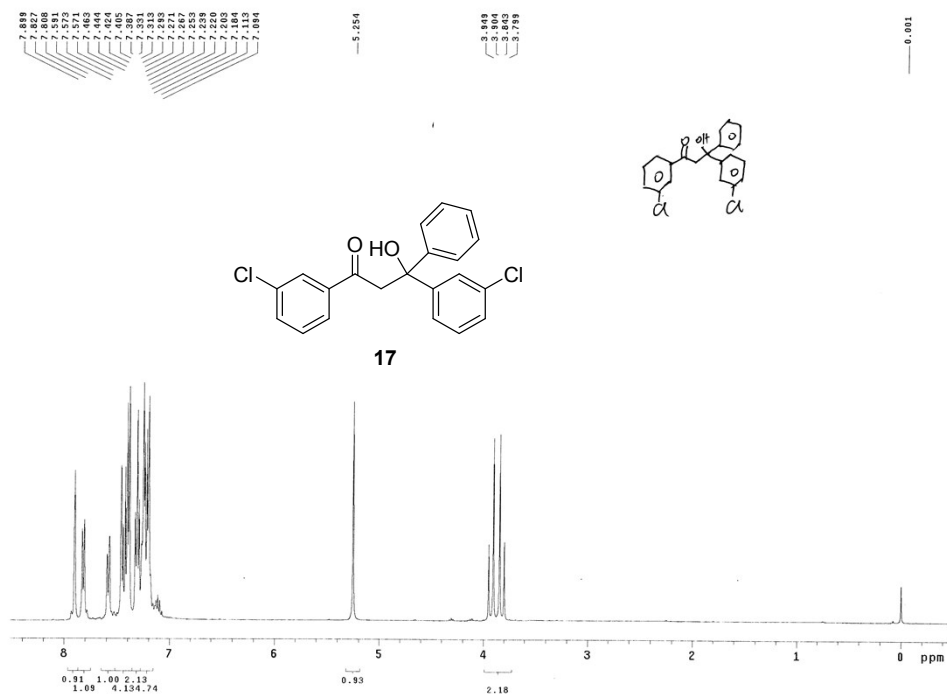

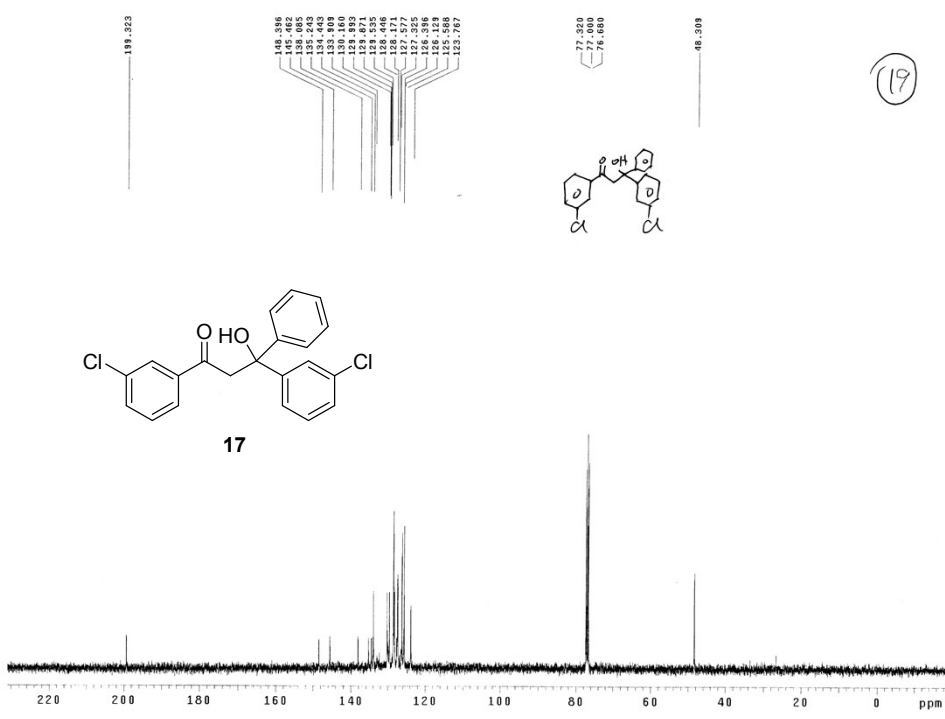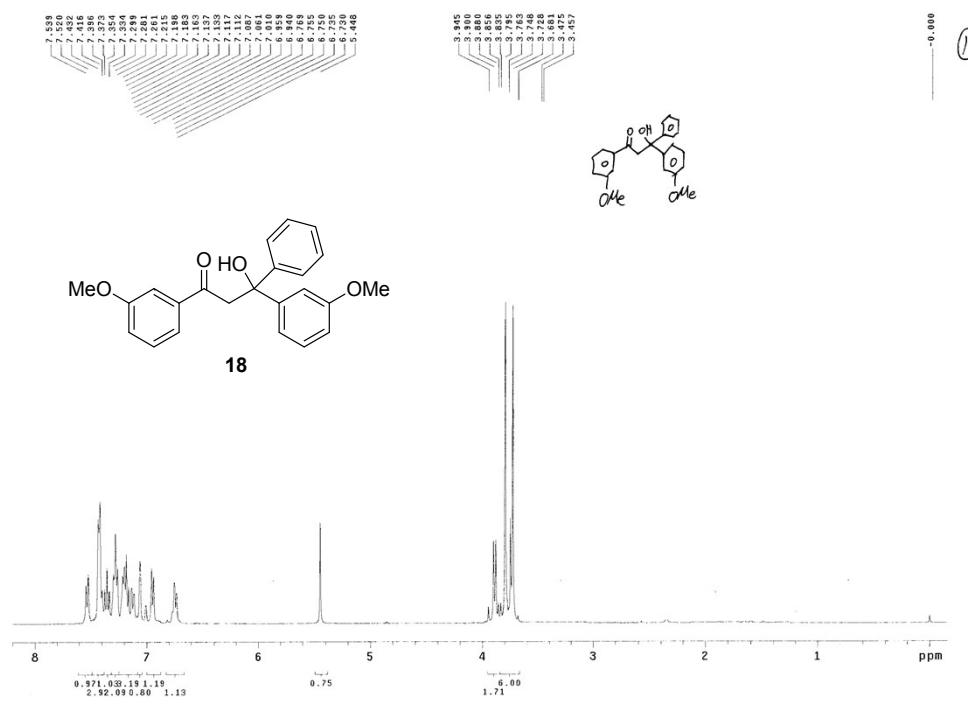

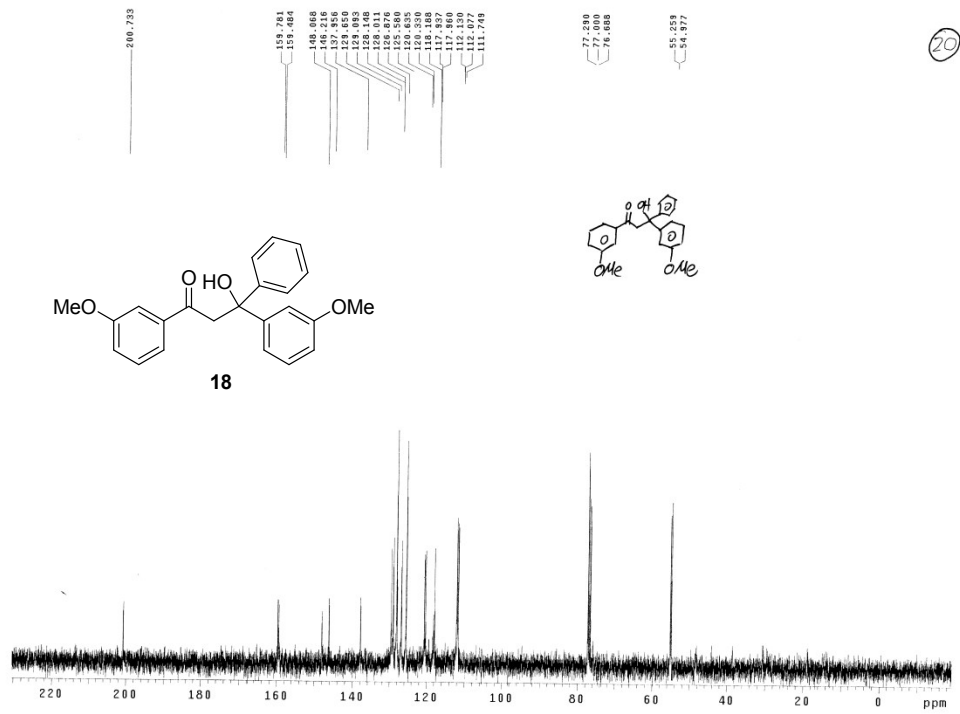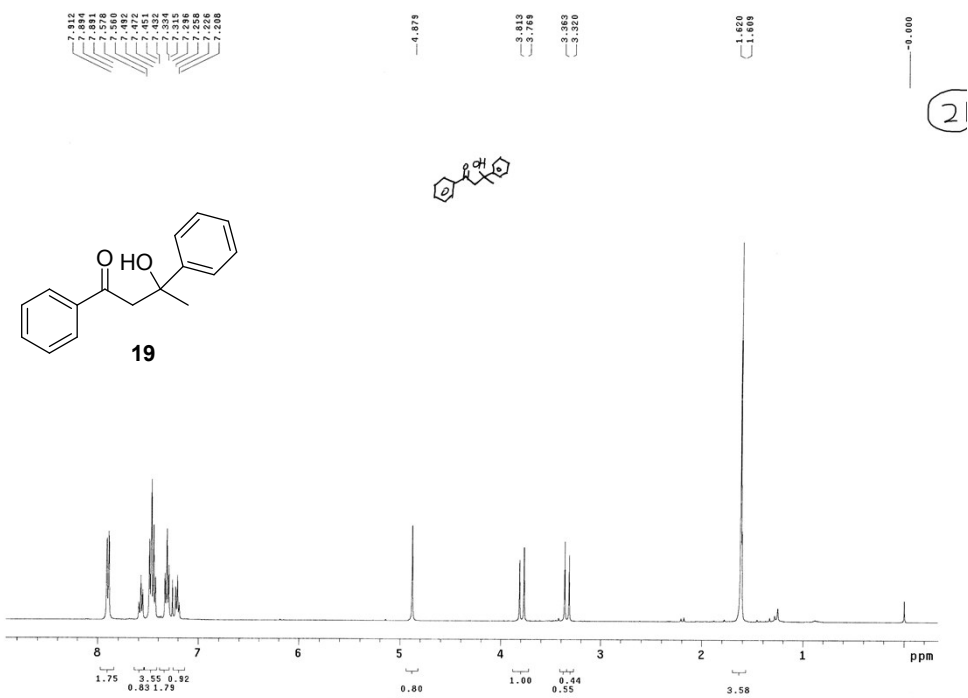

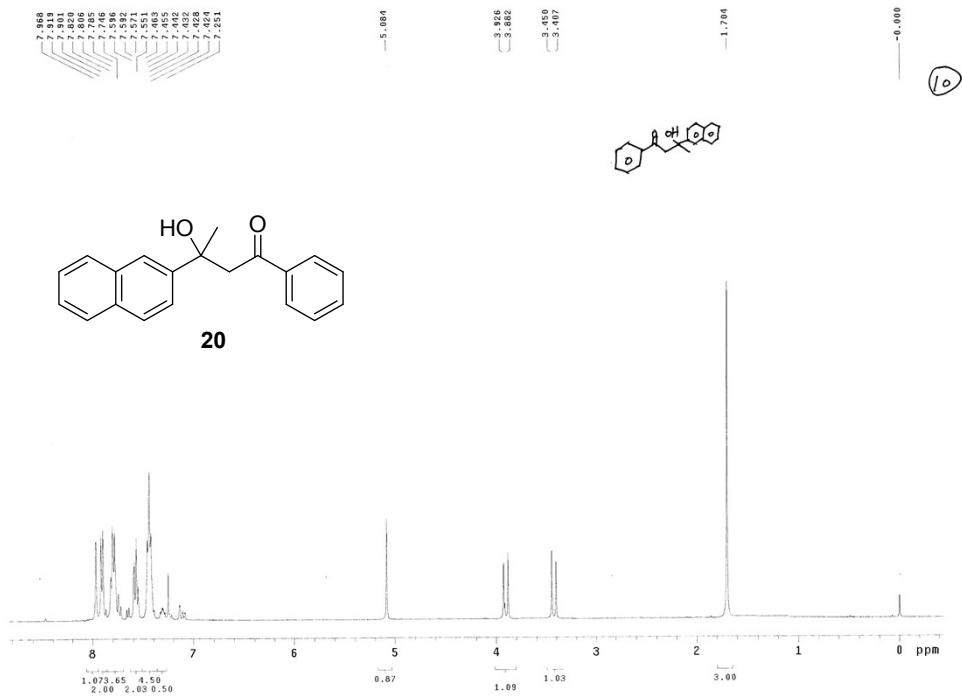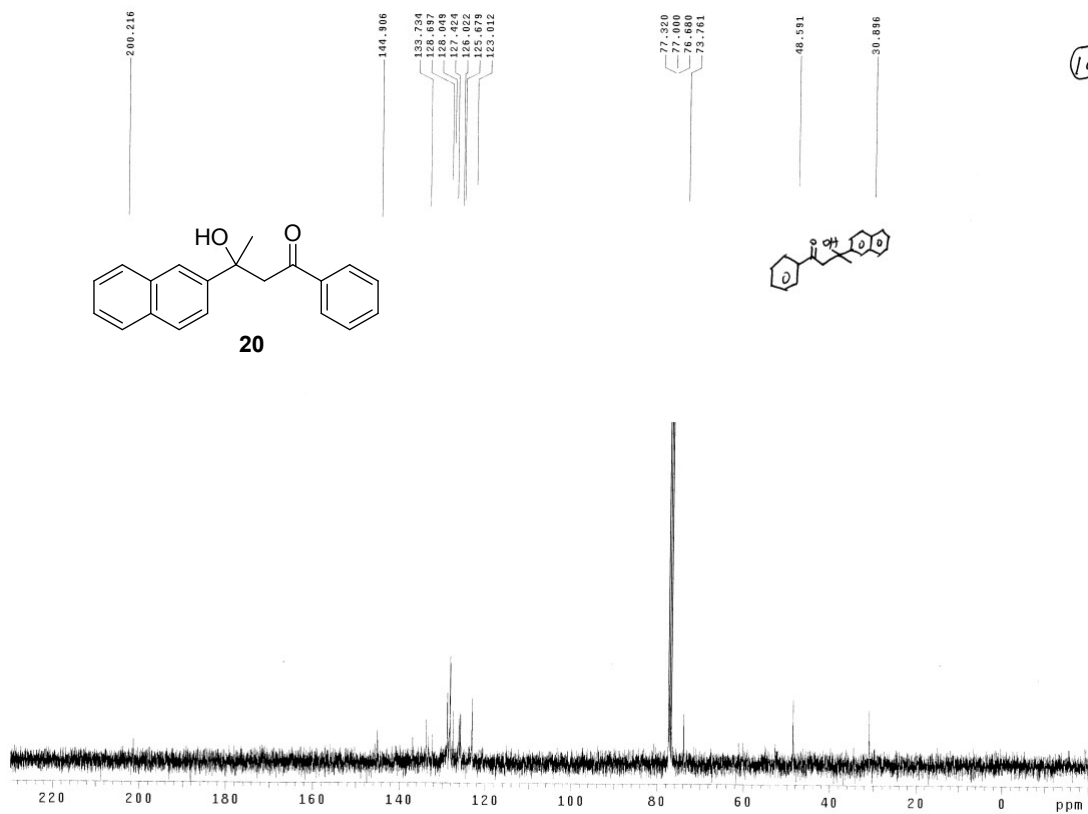



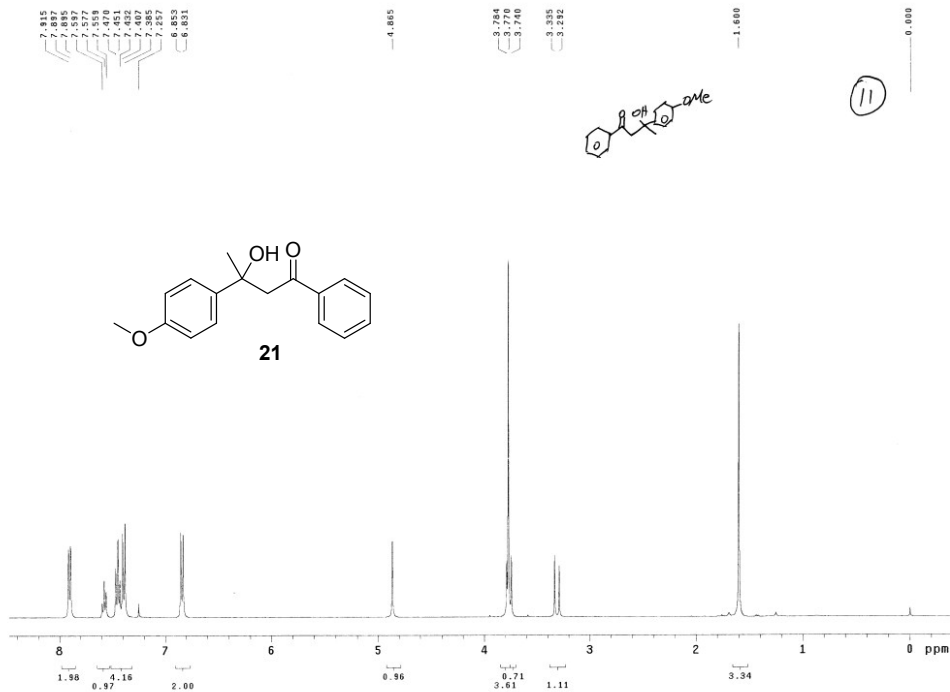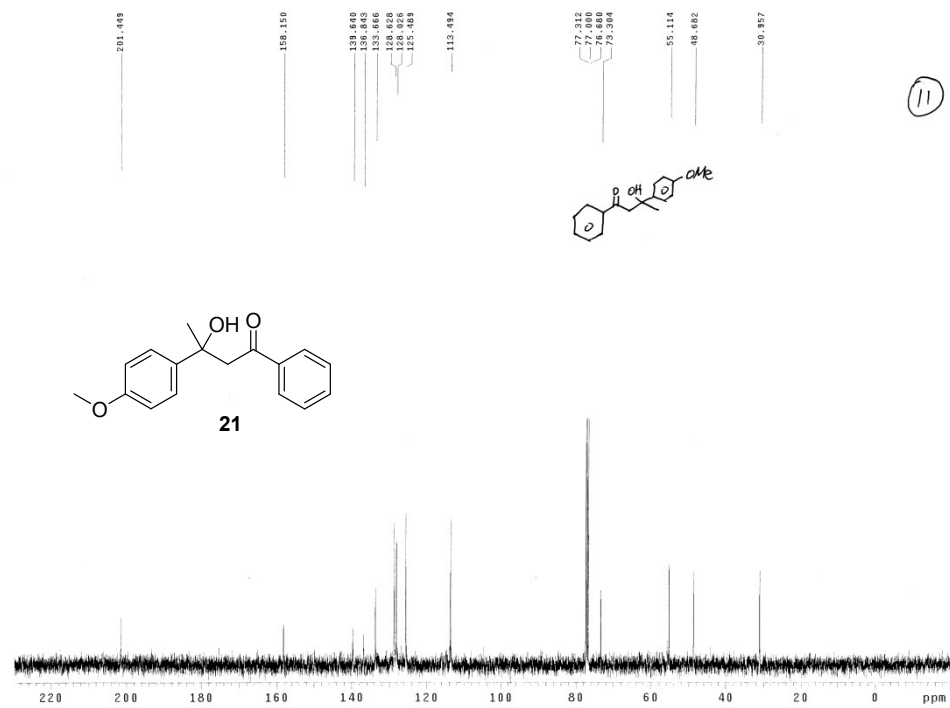

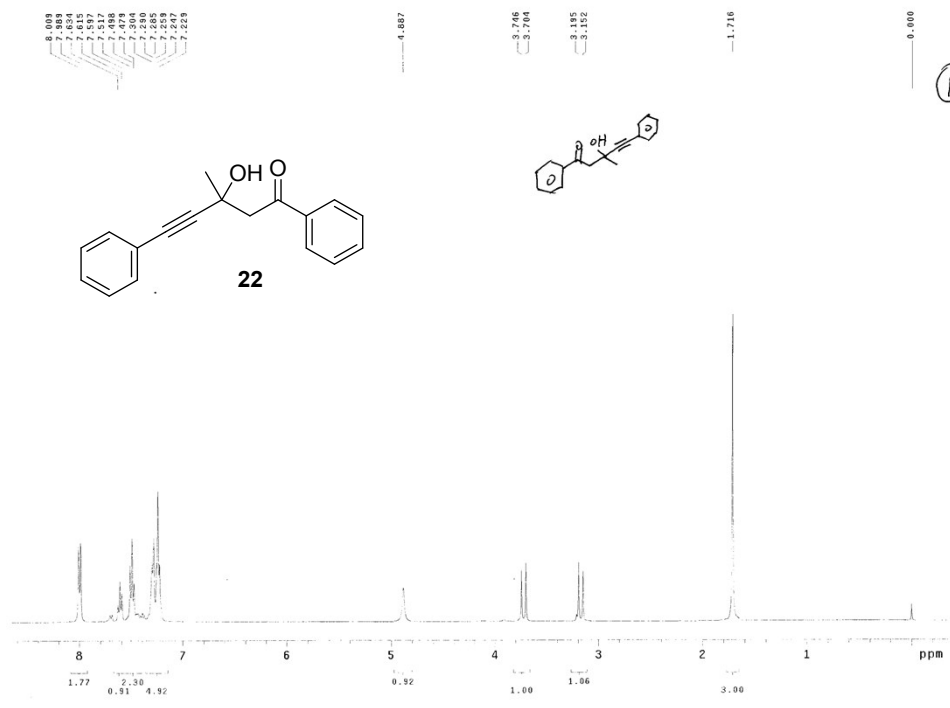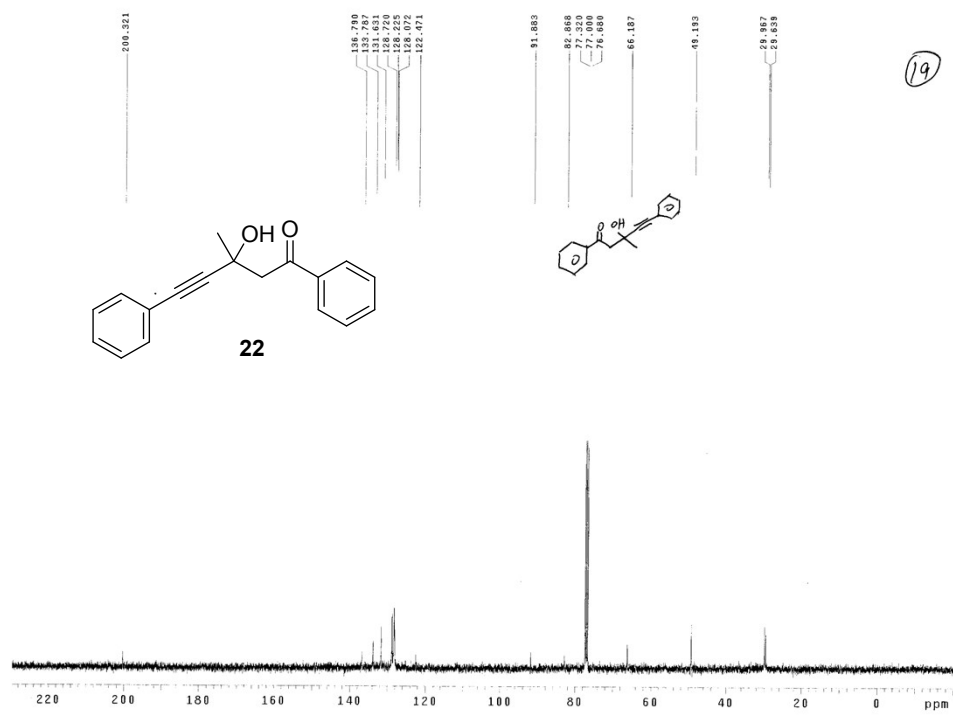

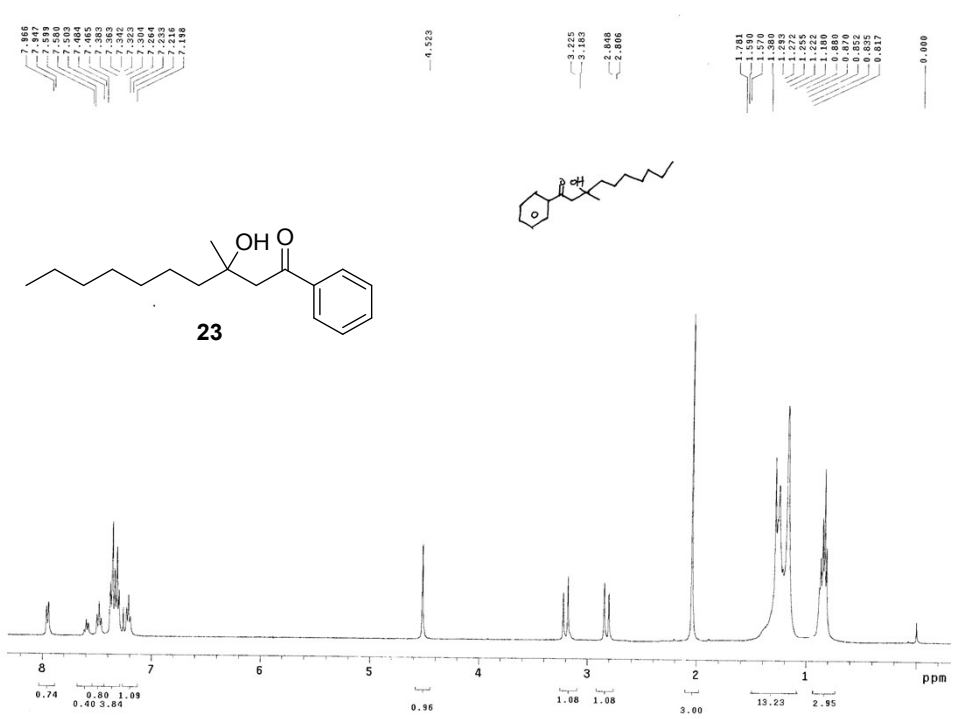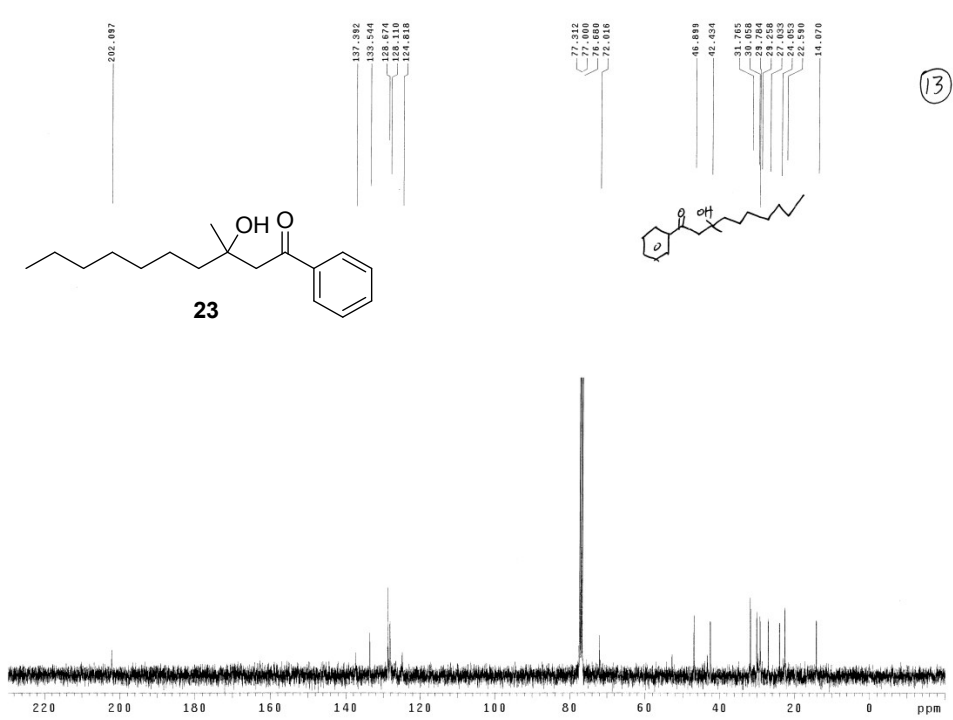

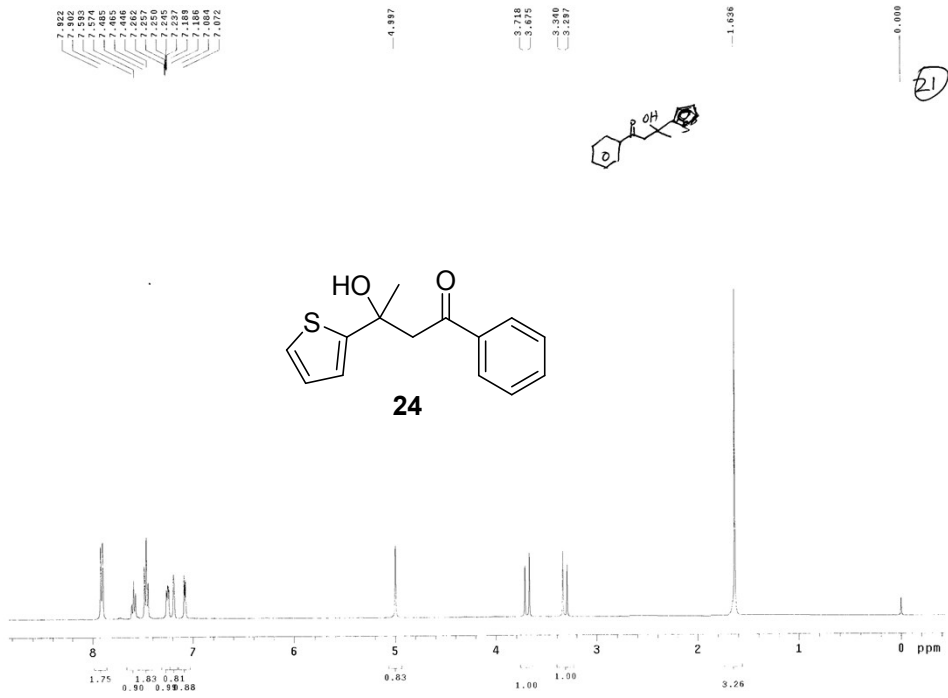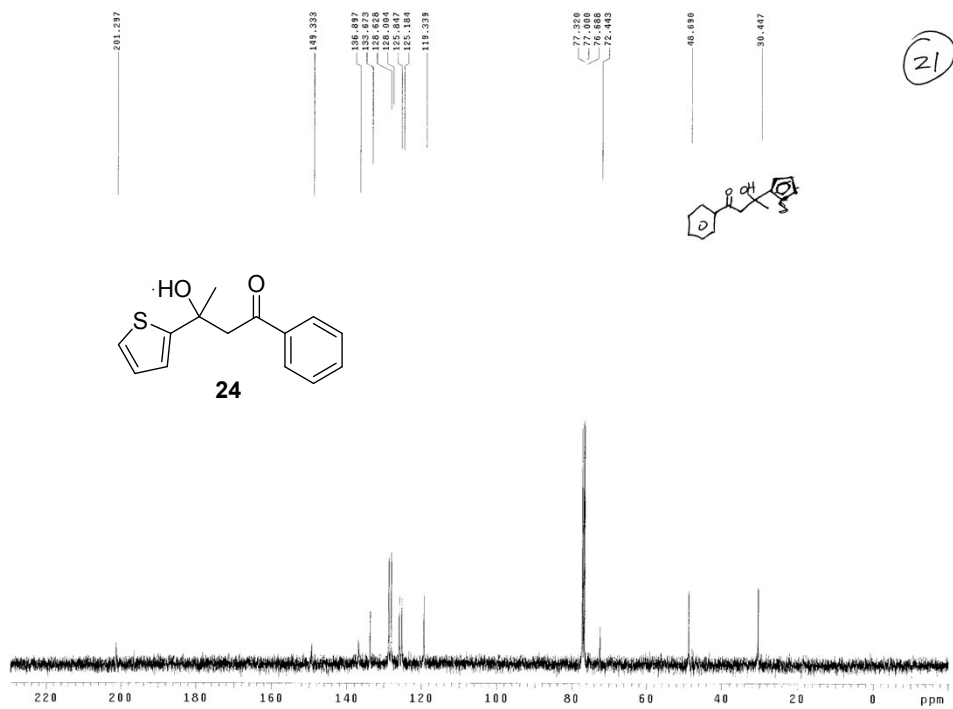

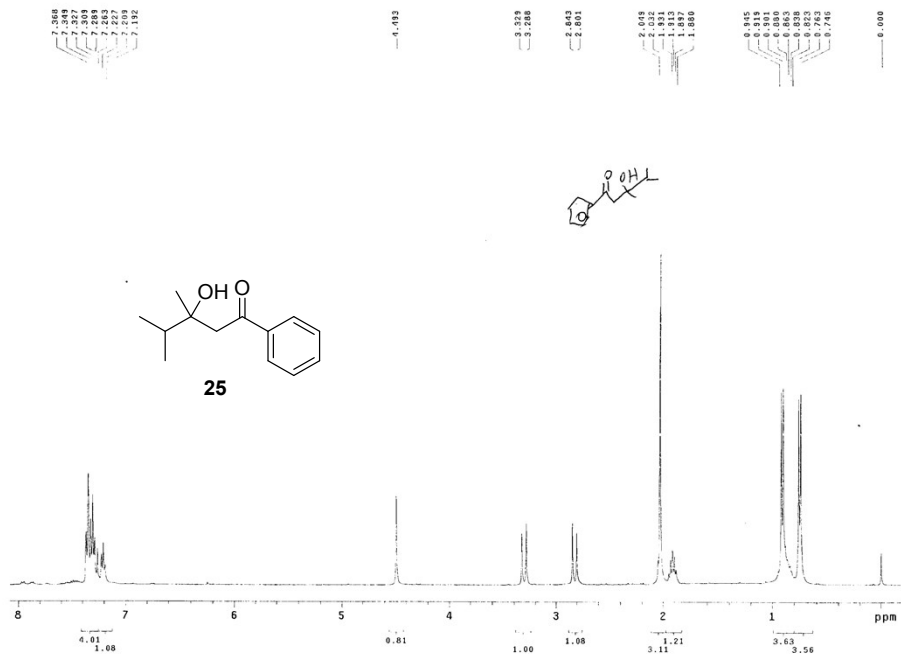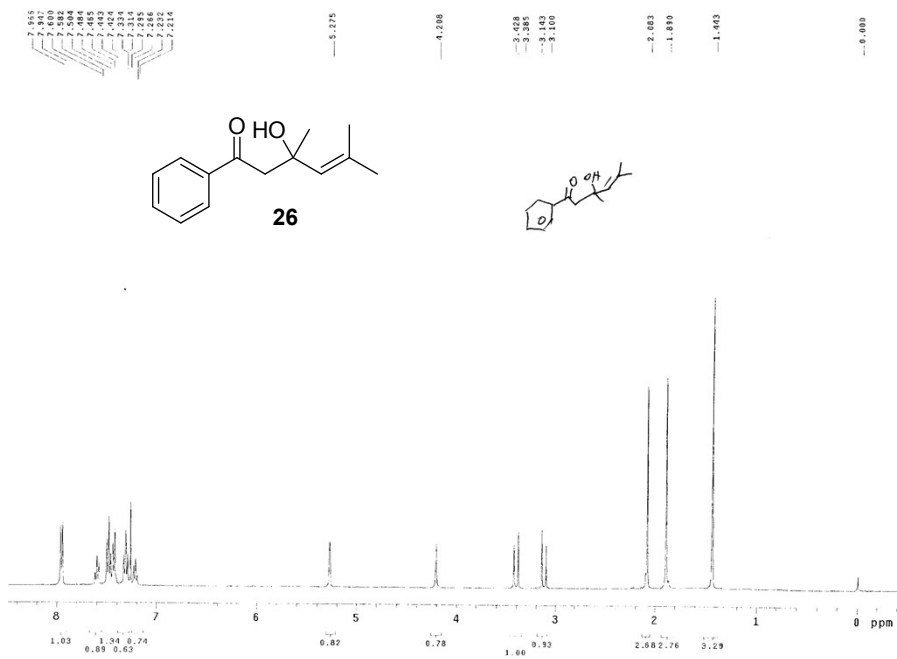

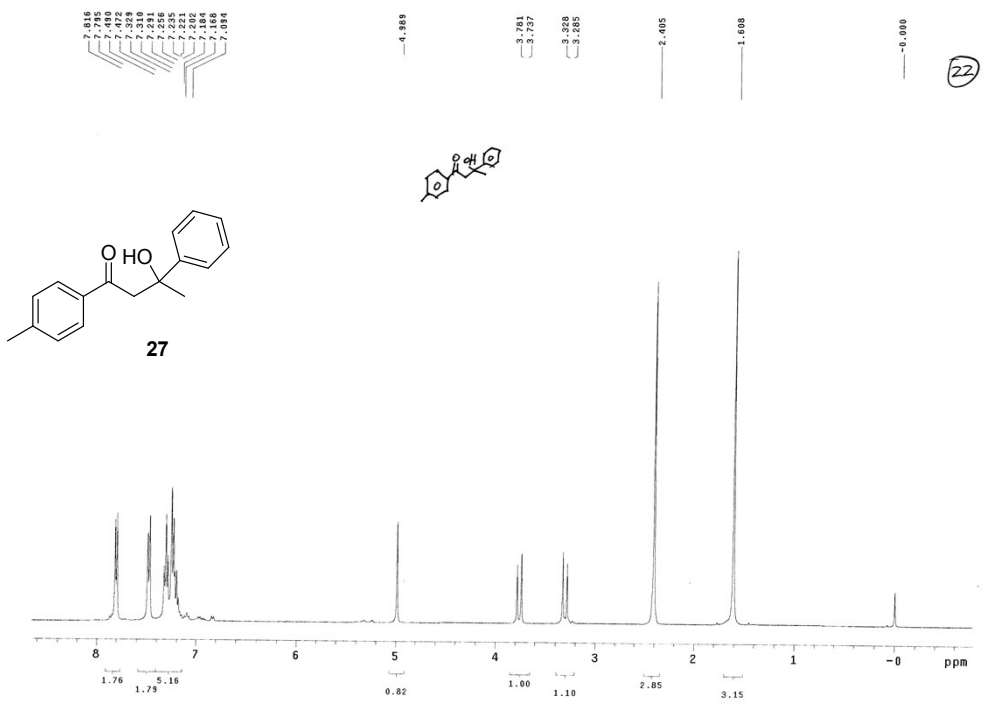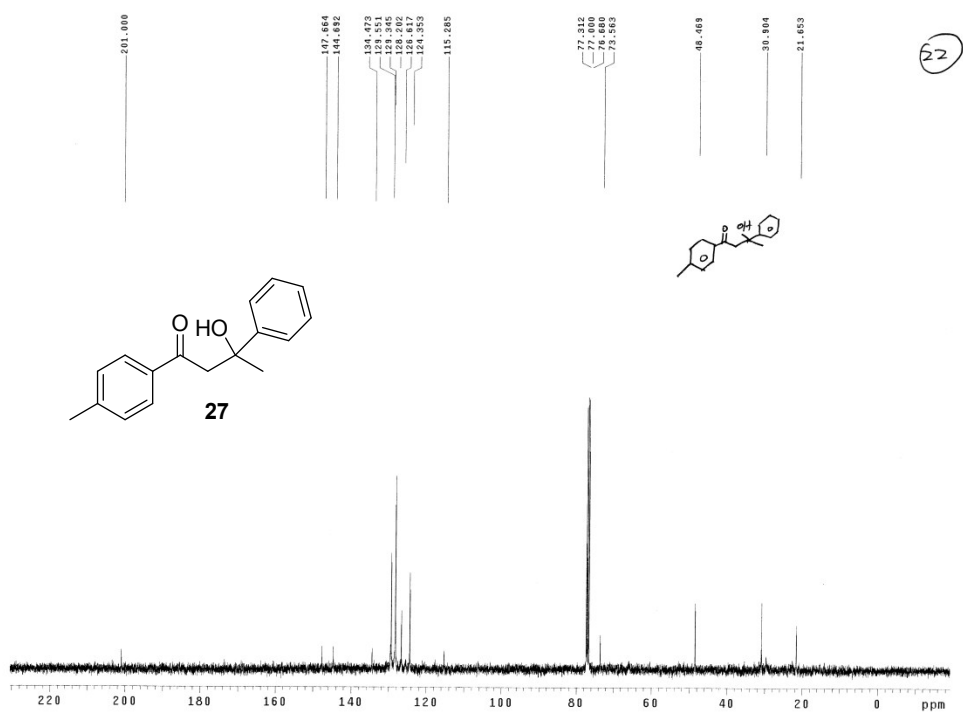

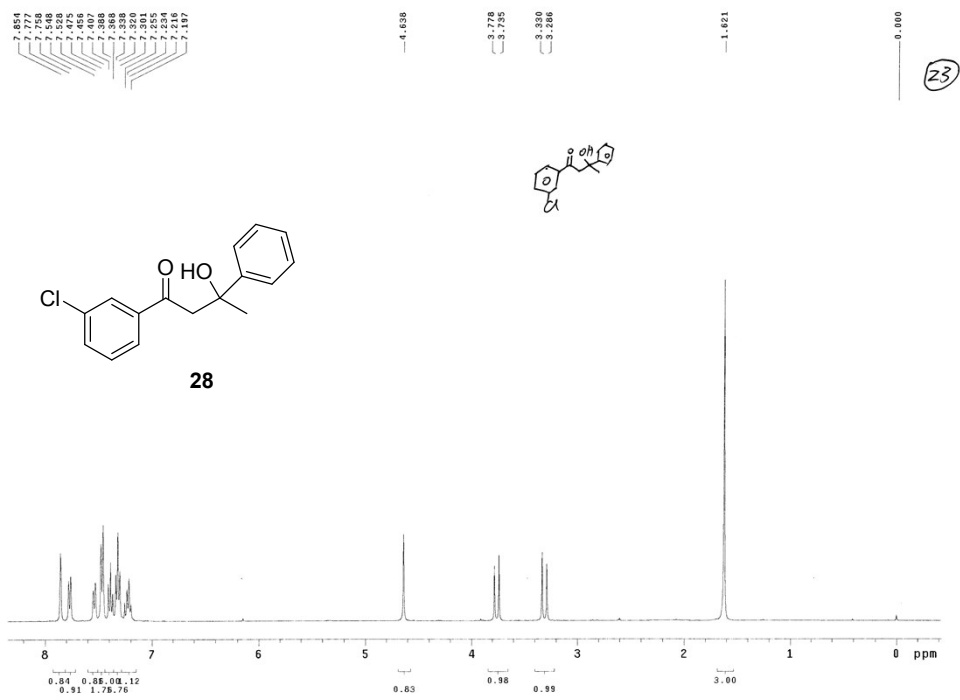

(23)

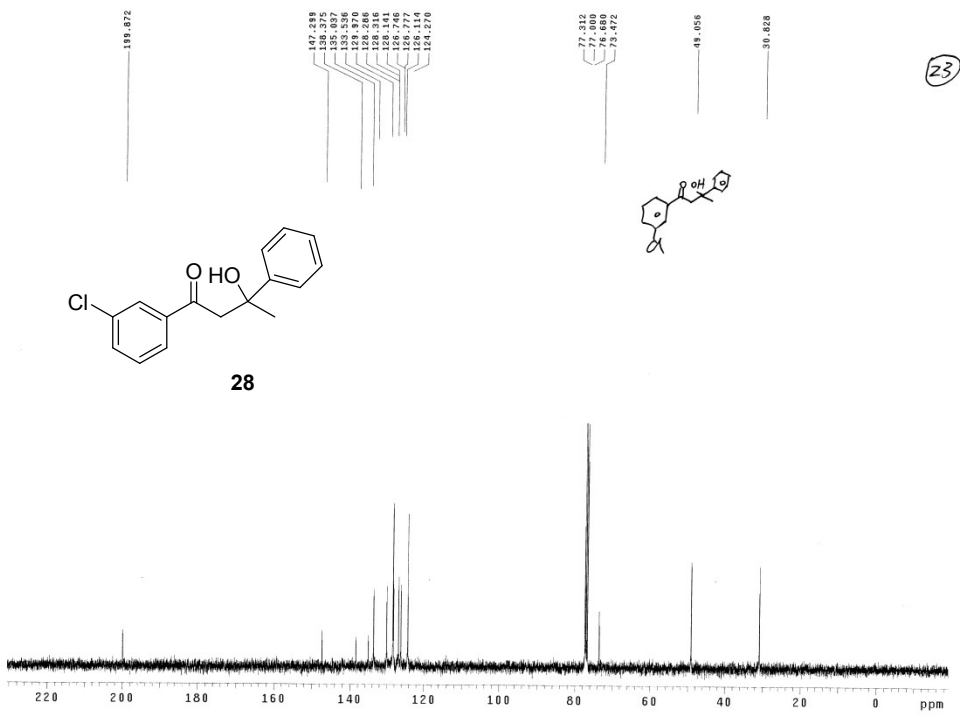

(23)

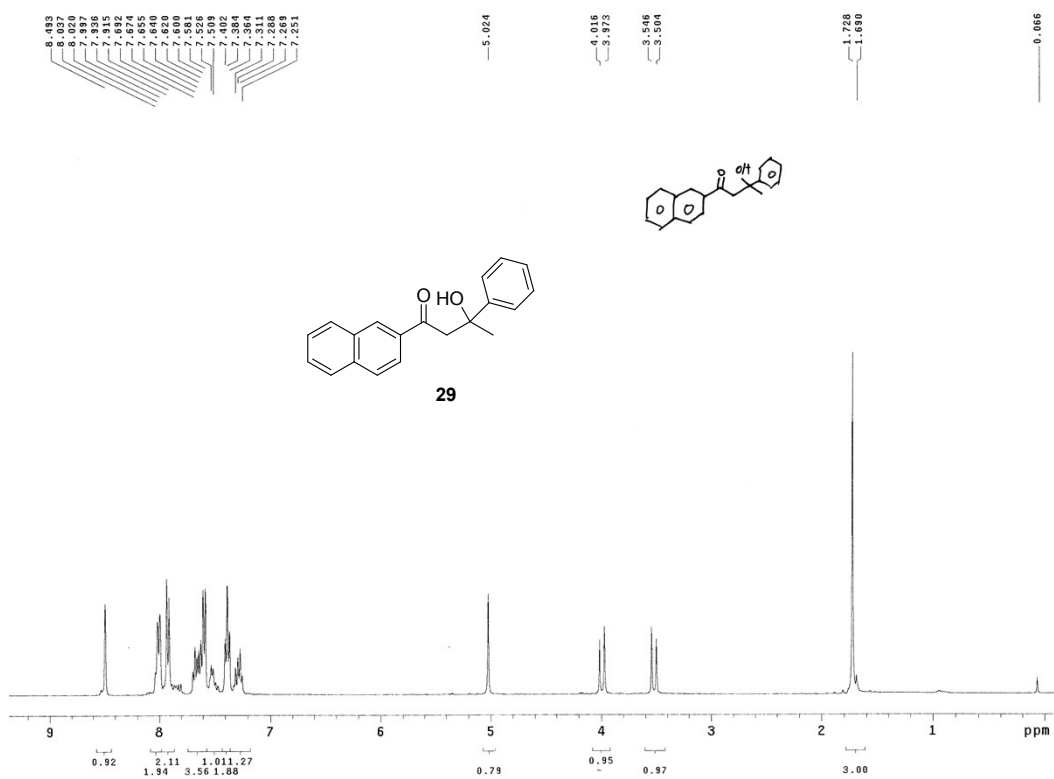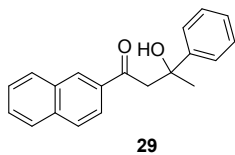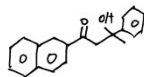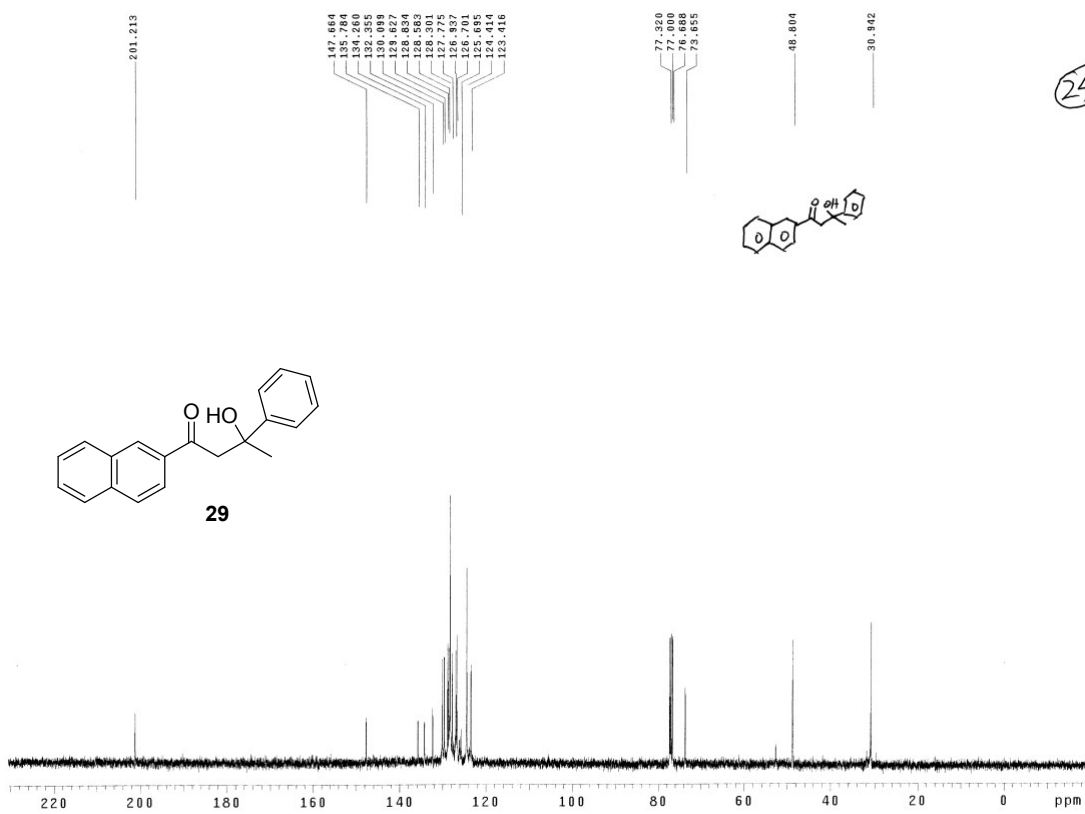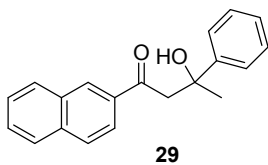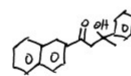

(24)







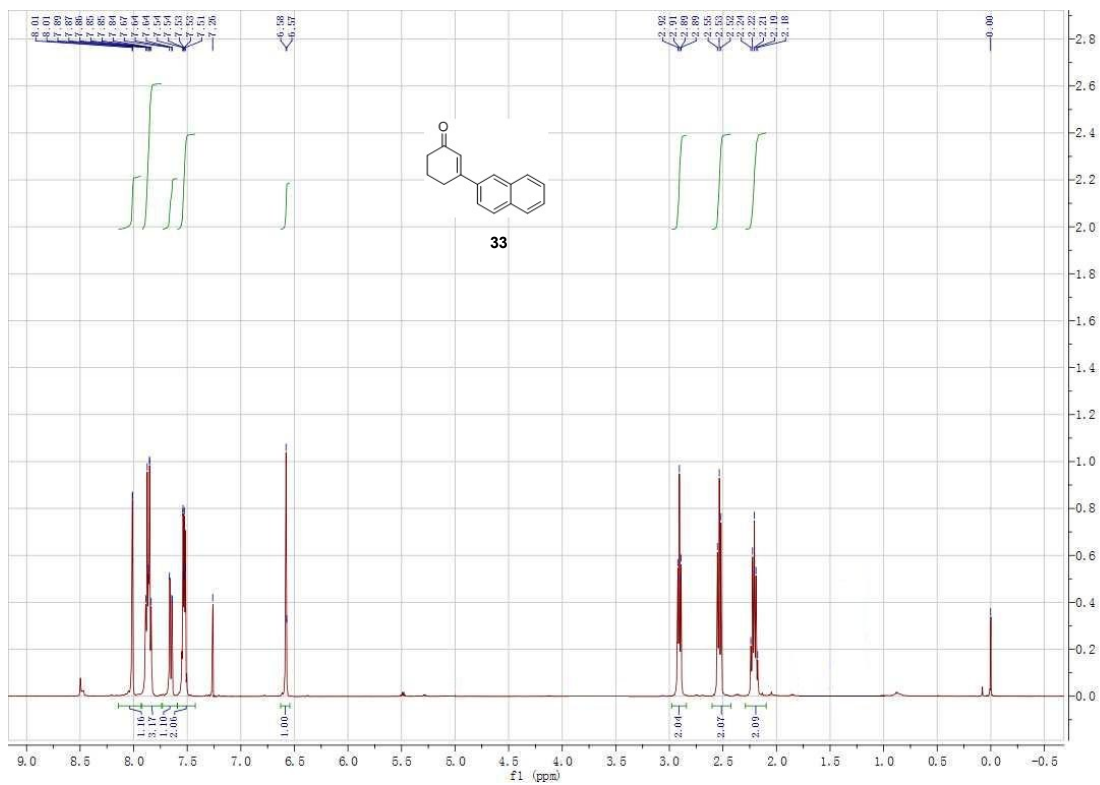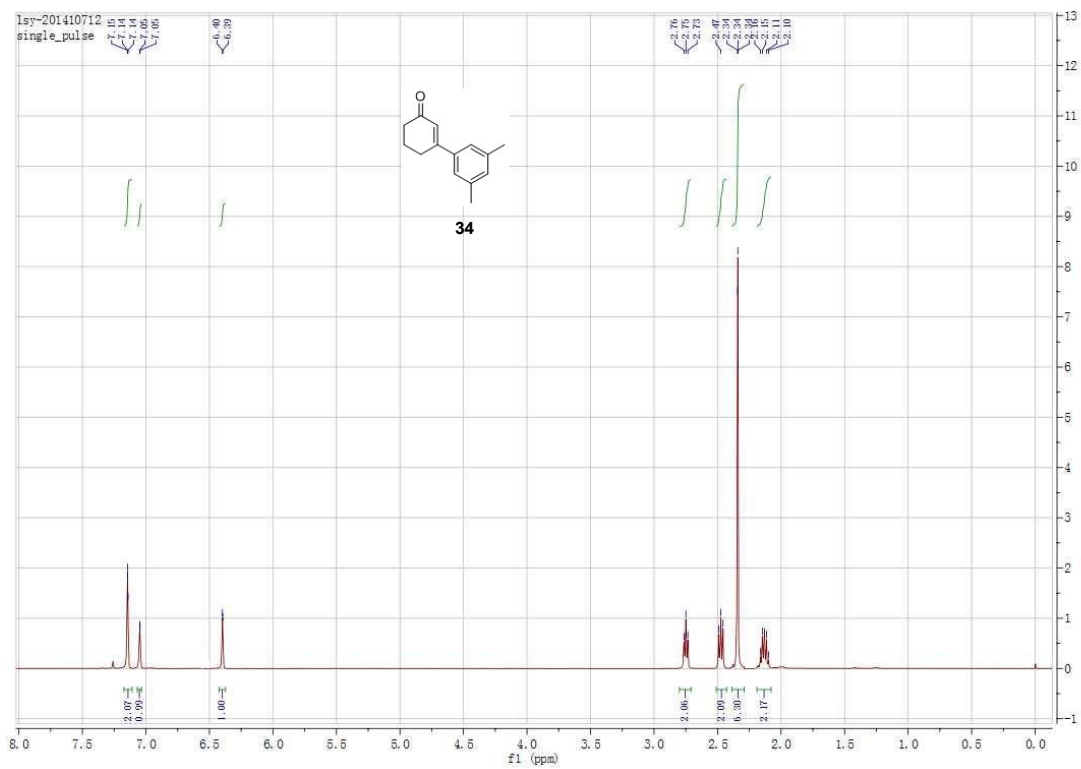

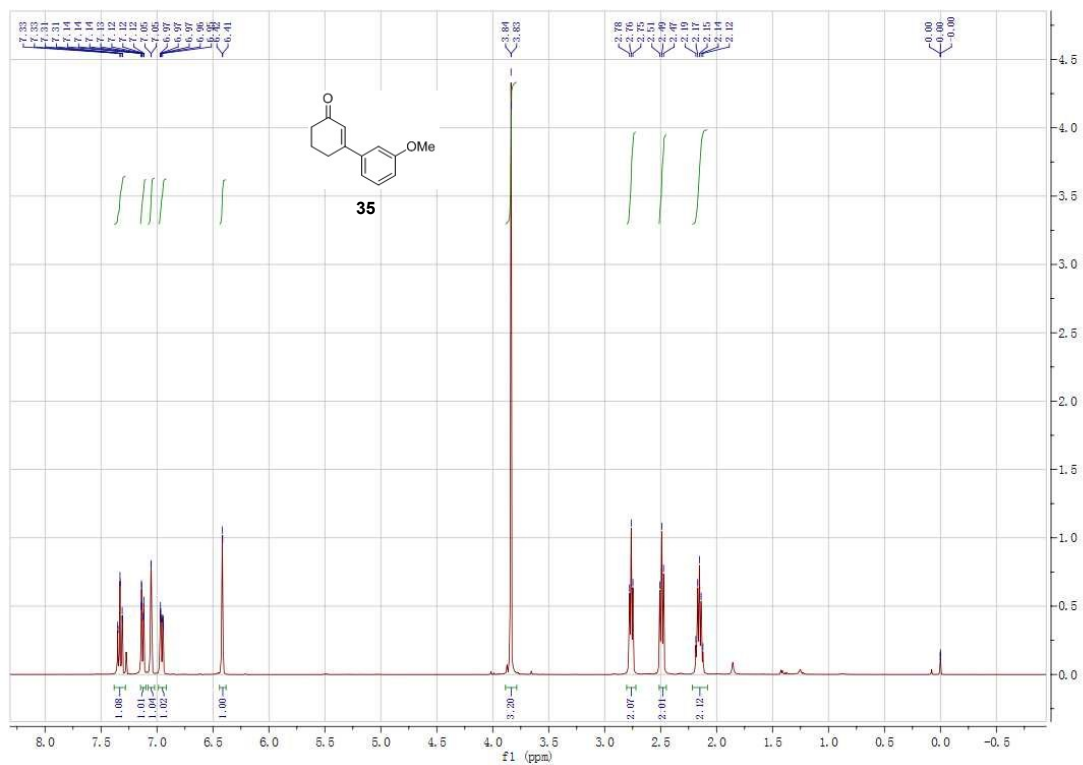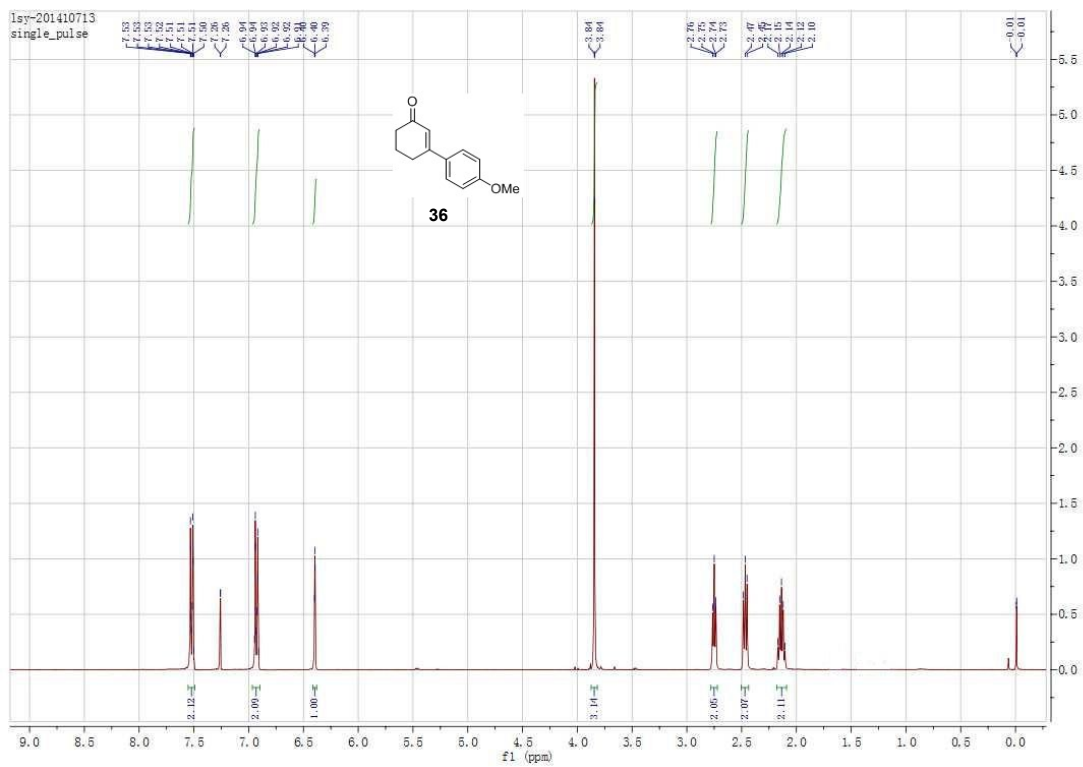

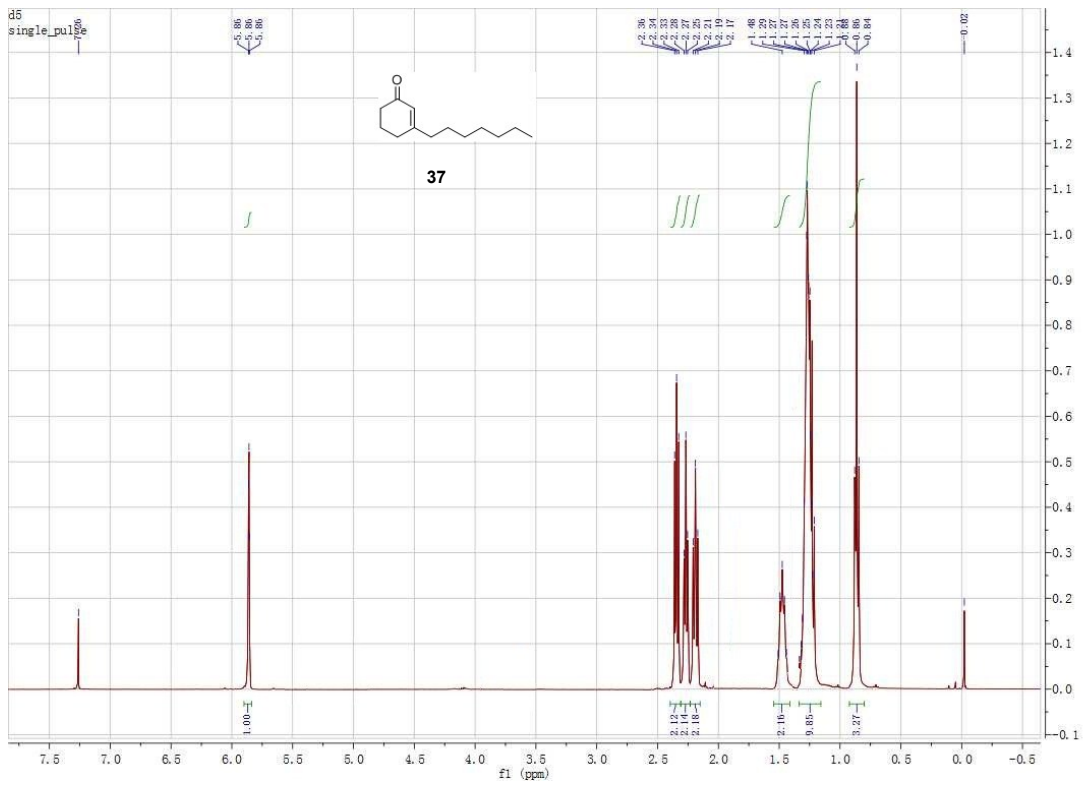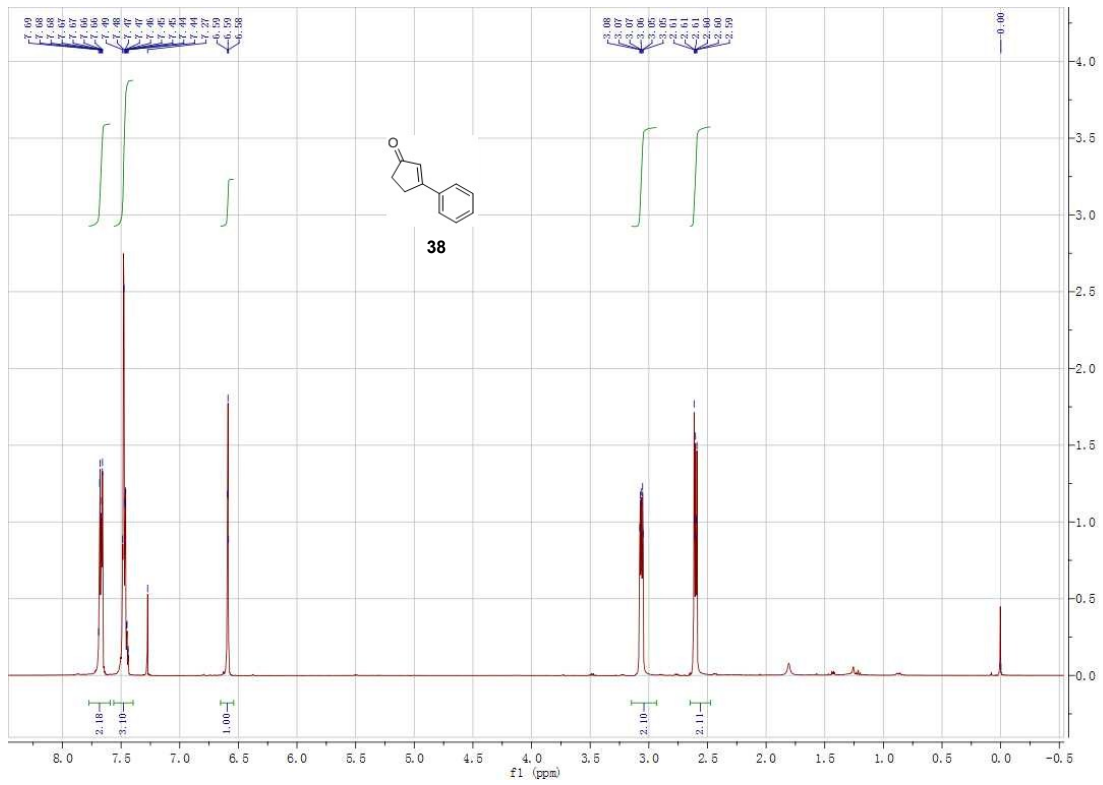

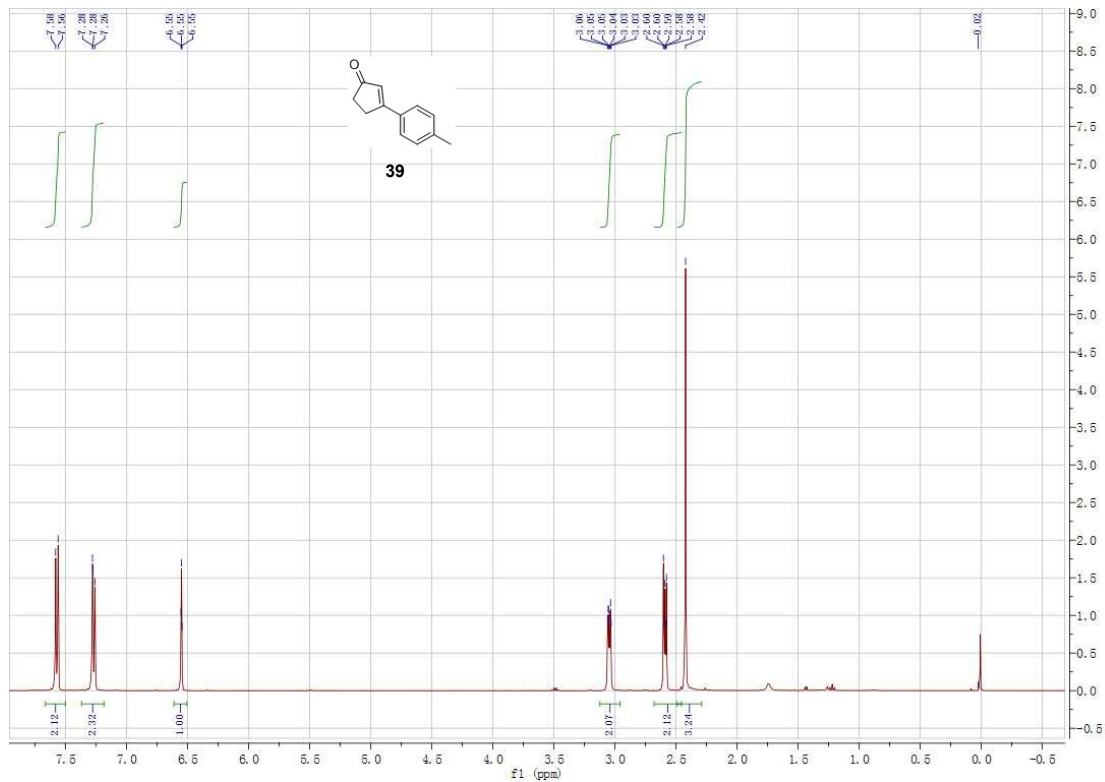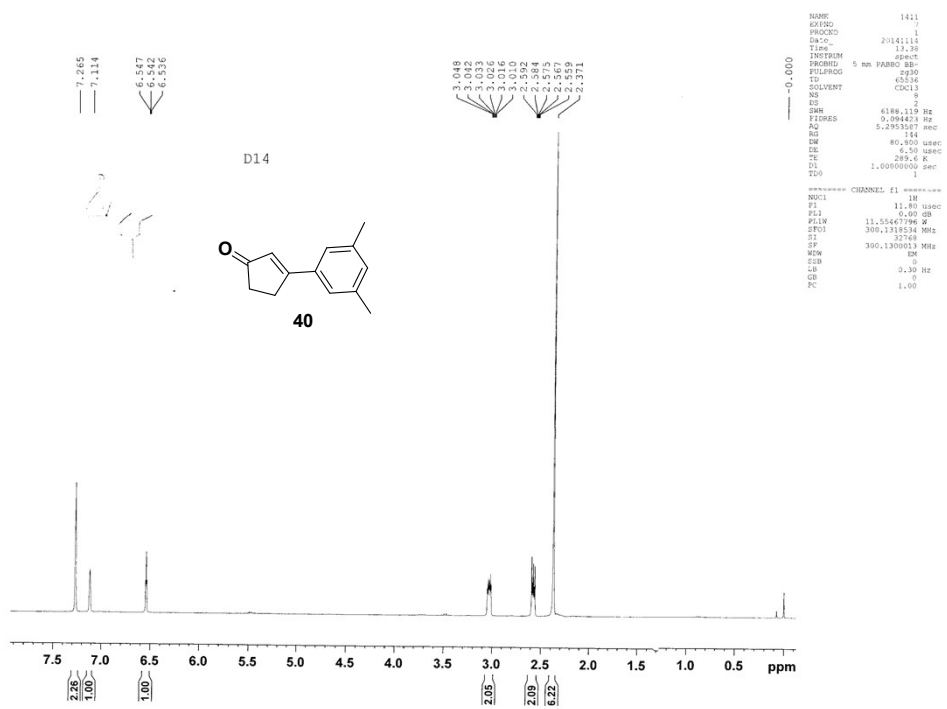

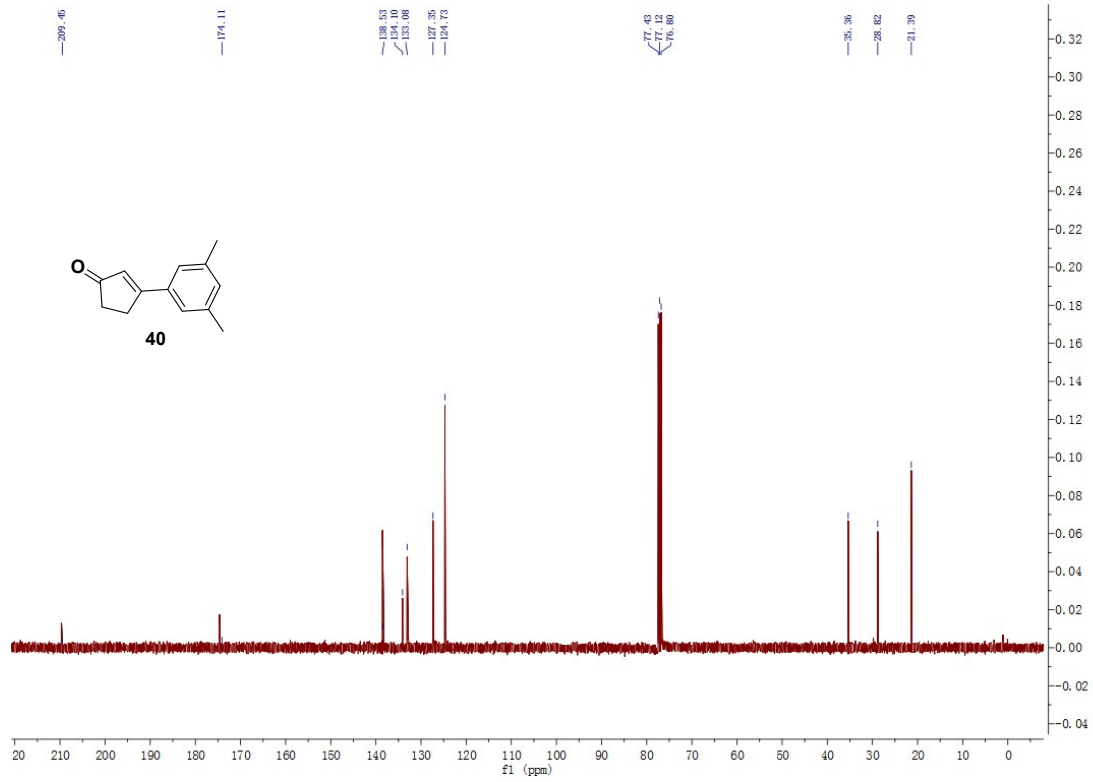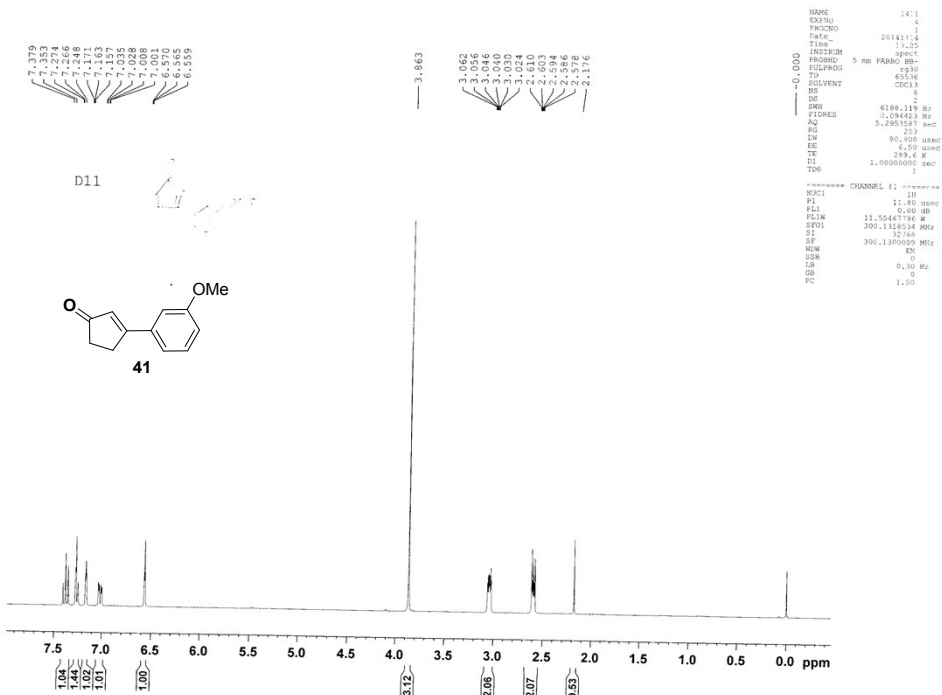

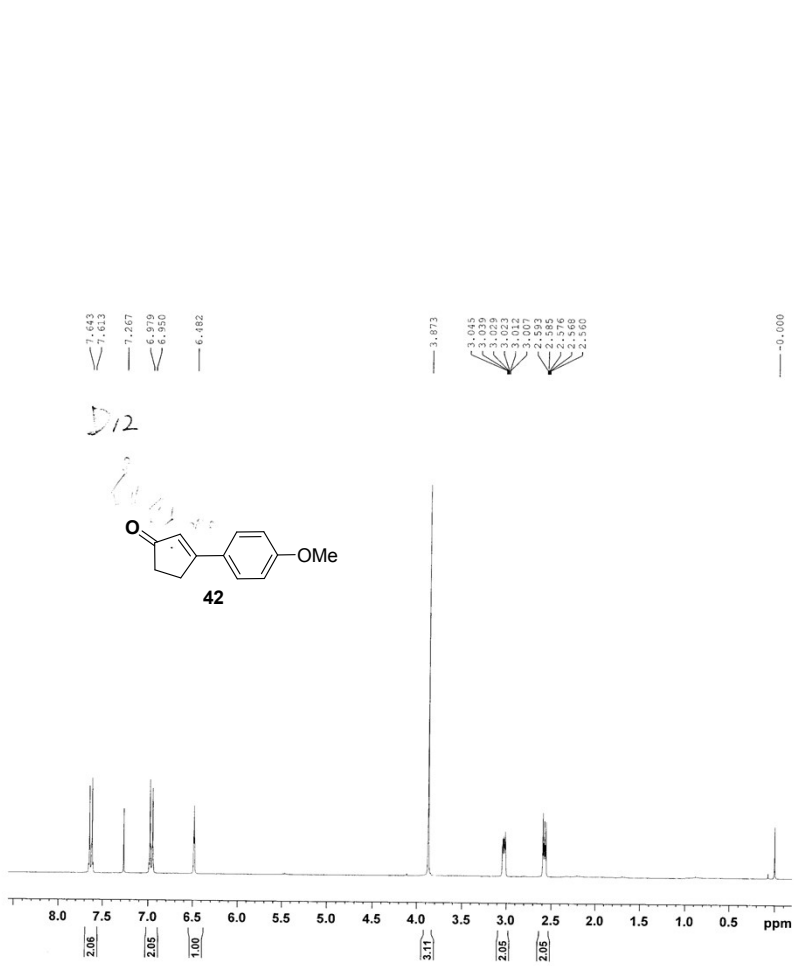

```

===== CHANNEL f1 =====
NUC1 1H
P1 11.00 usec
PL1 0.00 dB
PC1 11.55467794 dB
SFO1 300.1318054 MHz
SI 32768
SF 300.1300007 MHz
SOLV EM
SSB 0
LB 0.30 Hz
GB 0
PC 1.00
  
```

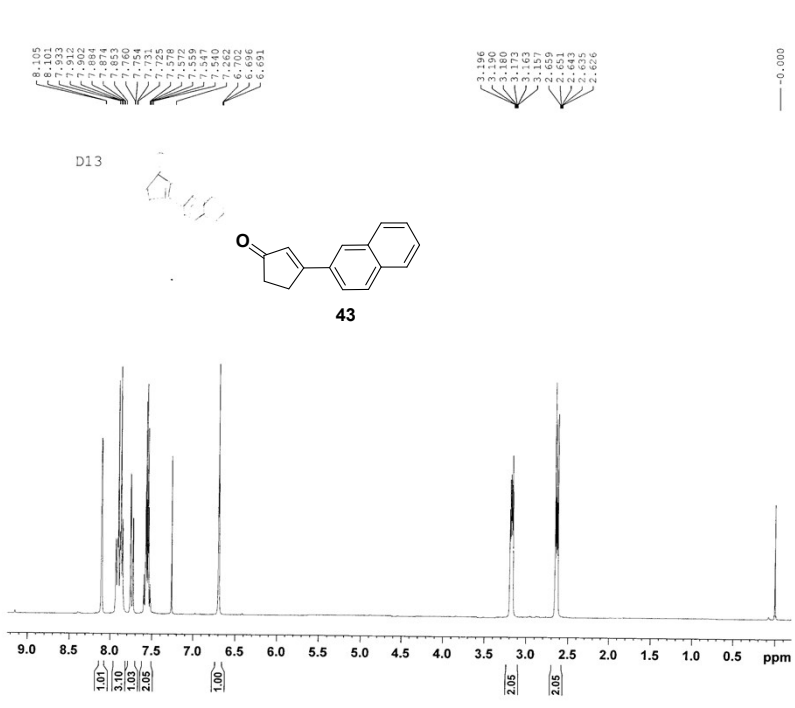

```

===== CHANNEL f1 =====
NUC1 1H
P1 11.00 usec
PL1 0.00 dB
PC1 11.55467794 dB
SFO1 300.1318054 MHz
SI 32768
SF 300.1300007 MHz
SOLV EM
SSB 0
LB 0.30 Hz
GB 0
PC 1.00
  
```



## 5. $^1\text{H}$ NMR and mass spectrometry for reaction mechanism.

### 5.1 $^1\text{H}$ NMR

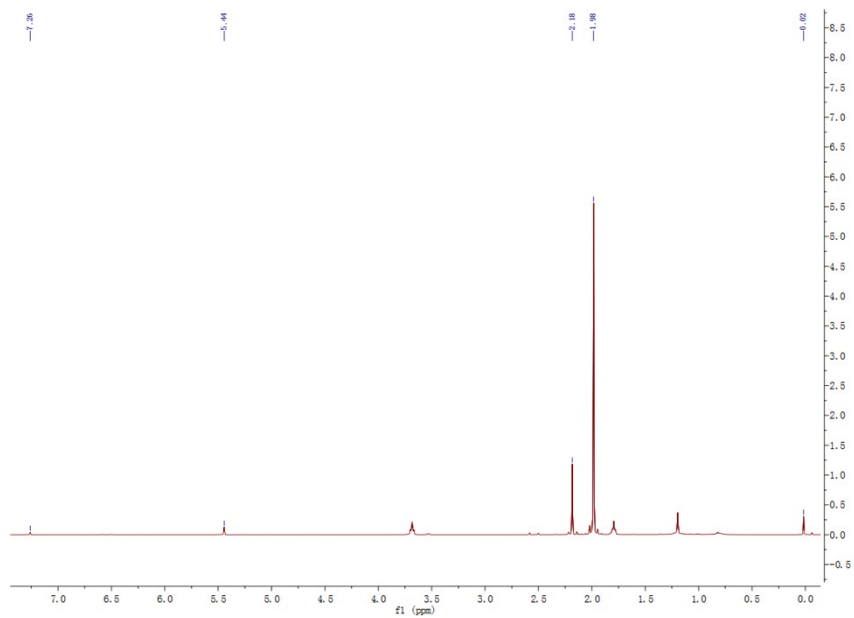

- (1)  $^1\text{H}$  NMR of deuterated acetylacetone. 20 mol% *i*-PrMgCl (0.77 M, 0.13 mL, 0.1 mmol, 0.2 eq.) was added to acetylacetone (0.0050 g, 0.5 mmol, 1.0 eq.) in anhydrous THF (1 mL) at 0 °C. After 30 min, the reaction was directly condensed to dryness in vacuum and the reaction mixture was directly characterized with  $^1\text{H}$  NMR, with a drop of  $\text{D}_2\text{O}$  added.

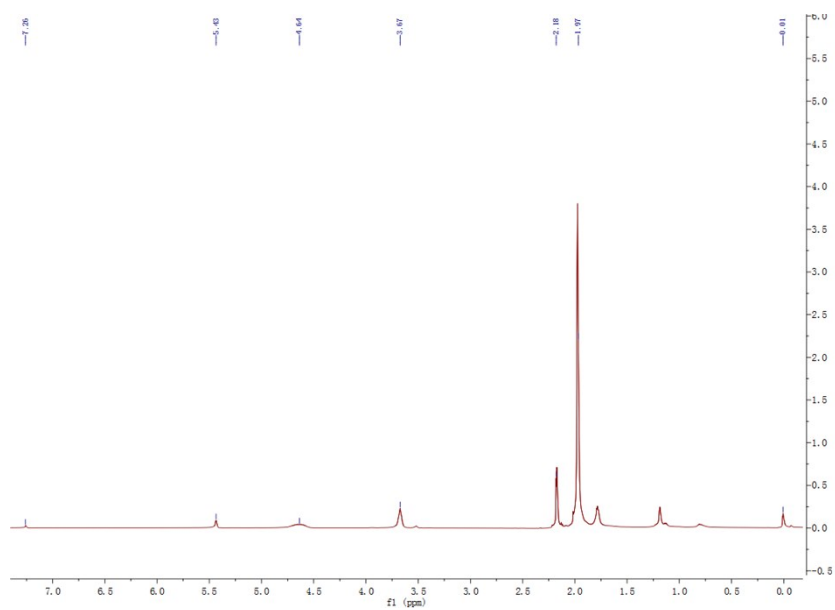

- (2)  $^1\text{H}$  NMR of deuterated acetylacetone. 20 mol% *i*-PrMgBr (0.70 M, 0.14 mL, 0.1 mmol, 0.2 eq.) was added to acetylacetone (0.0050 g, 0.5 mmol, 1.0 eq.) in anhydrous THF (1 mL) at 0 °C. After 30 min, the reaction was

directly condensed to dryness in vacuum and the reaction mixture was directly characterized with  $^1\text{H}$  NMR, with a drop of  $\text{D}_2\text{O}$  added.

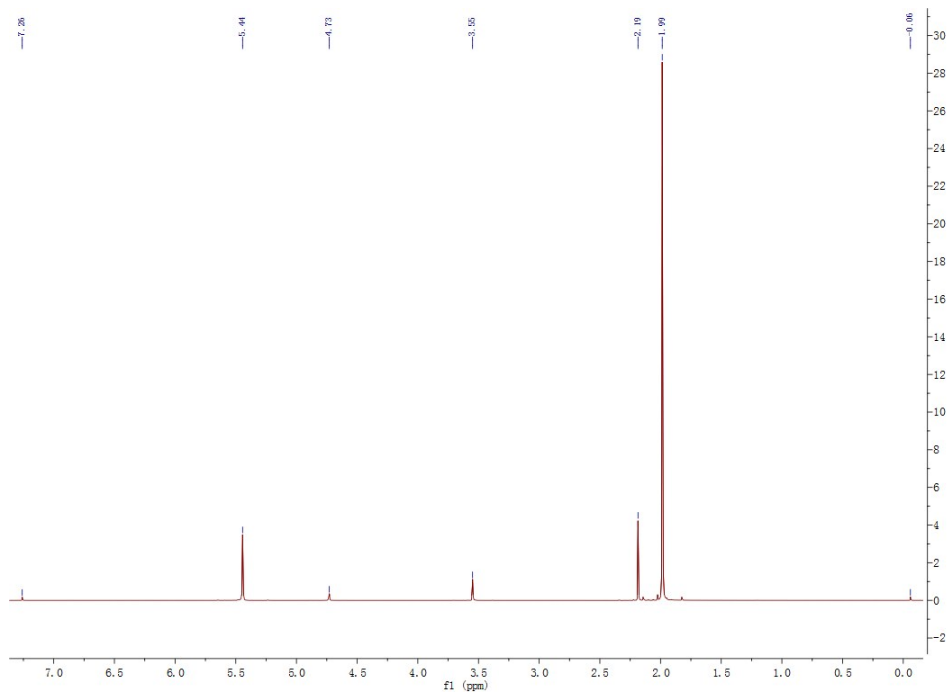

(3)  $^1\text{H}$  NMR of acetylacetonone in  $\text{CDCl}_3$  in the addition of one drop of  $\text{D}_2\text{O}$ .

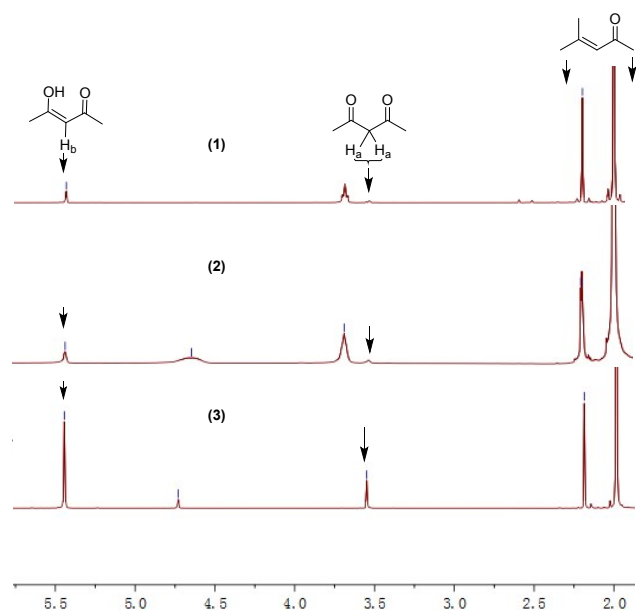

**Figure 1.** The comparison of  $^1\text{H}$  NMR (400 MHz) spectrum of deuterated acetylacetonone in  $\text{CDCl}_3$ , (1) the deuterated acetylacetonone after reacted with 20 mol% *i*-PrMgCl. (2) the deuterated acetylacetonone after reacted with 20 mol% *i*-PrMgBr. (3) the deuterated acetylacetonone.

## 5.2 Mass spectrometry

### 5.2.1

To a solution *i*PrMgCl (0.77 M, 0.13 mL, 0.1 mmol, 0.2 eq.) was dropwise added acetylacetone (0.0050 g, 0.5 mmol, 1.0 eq.) in anhydrous THF (1 mL) at 0 °C. The mixture was stirred for 15 min at 0 °C and then acetic anhydride (12  $\mu$ L, 0.125 mmol, 0.25 eq.) was added. The reaction was directly analyzed with HR-MS. HRMS calcd for  $[C_7H_{10}+Na]^+$  165.0528, found 165.0522.

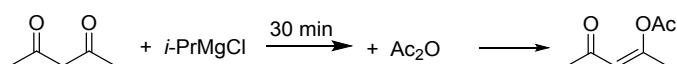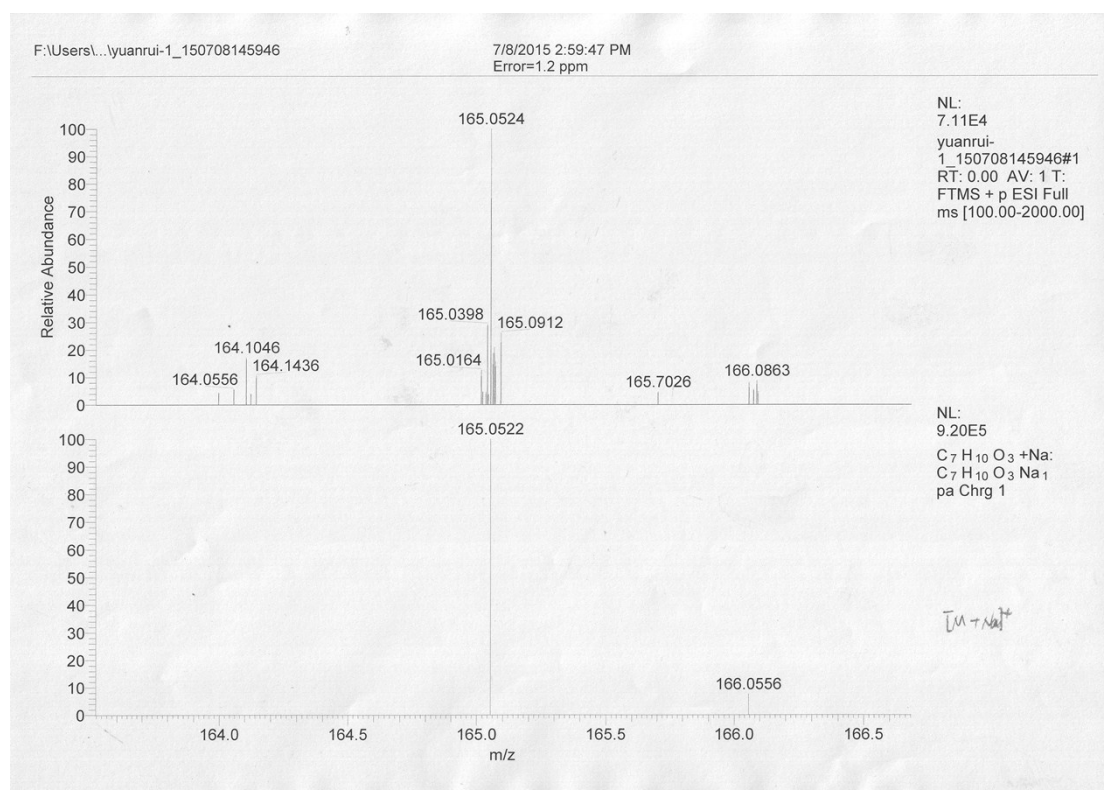

### 5.2.2

To a solution *i*PrMgCl (0.77 M, 0.13 mL, 0.1 mmol, 0.2 eq.) was dropwise added acetylacetone (0.0050 g, 0.5 mmol, 1.0 eq.) in anhydrous THF (1 mL) at 0 °C. The mixture was stirred for 15 min at 0 °C and then *t*-butyldimethylsilyl chloride (0.0188 g, 0.125 mmol, 0.25 eq.) was added. The reaction was directly analyzed with GC-MS. Fragment peak that without tertiary butyl were determined at 157.

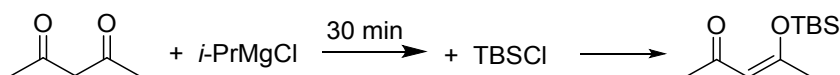

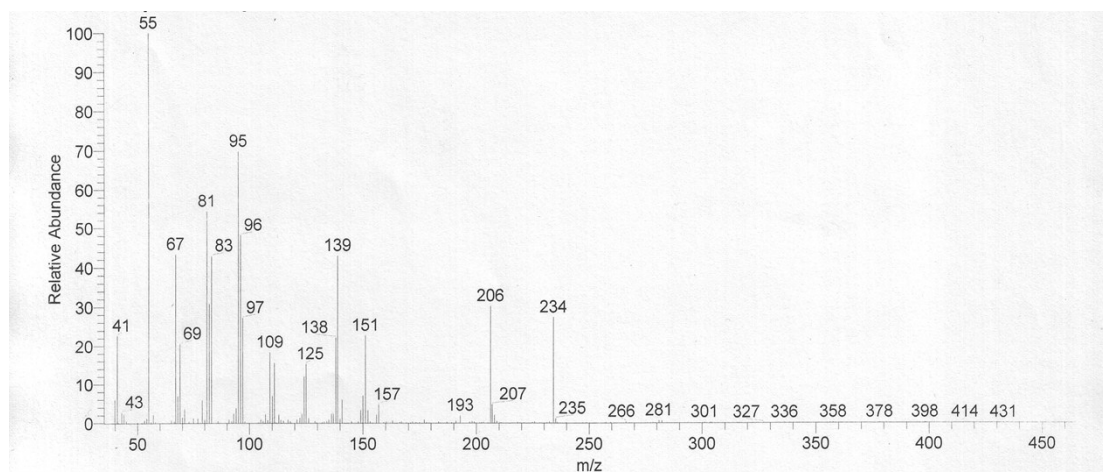

### 5.2.3

To a solution *i*-PrMgCl (0.77 M, 0.13 mL, 0.1 mmol, 0.2 eq.) was dropwise added acetylacetone (0.0050 g, 0.5 mmol, 1.0 eq.) in anhydrous THF (1 mL) at 0 °C. The mixture was stirred for 0.5 h at 0 °C and then PhMgBr (0.9 M, 1.4 mL, 1.25 mmol, 2.5 eq.) was added. The mixture was warmed to 40 °C. After stirring for 4 h at 40 °C, the reaction was quenched with D<sub>2</sub>O. The purified product was analyzed with HR-MS. HRMS calcd for [C<sub>11</sub>H<sub>12</sub>D<sub>2</sub>O–D<sub>2</sub>O+Na]<sup>+</sup> 183.0786, found 184.0783, and for [C<sub>11</sub>H<sub>12</sub>D<sub>2</sub>O<sub>2</sub>–DHO+Na]<sup>+</sup> 184.0849, found 184.0843.

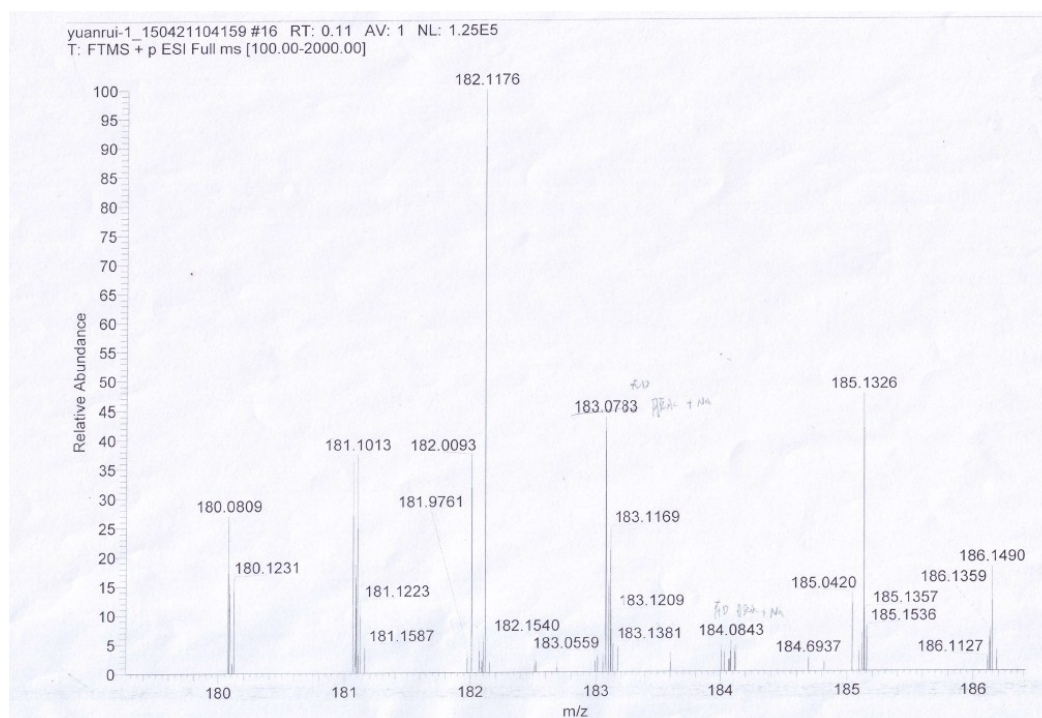

## 6. General Procedure for the sequential Grignard reactions

To a solution of *i*-PrMgCl (0.77 M, 0.05 mL, 0.04 mmol, 0.2 eq.) was dropwise added the linear 1,3-diketone (0.2 mmol, 1.0 eq.) in anhydrous THF (1 mL) at 0 °C. The mixture was stirred for 30 min at 0 °C and then the bromide Grignard reagent (0.5 mmol, 2.5 eq.) was introduced. The mixture was warmed to 40 °C. After stirring for 4 h at 40 °C, the mixture was cooled to 0 °C and then another quantum of bromide Grignard reagent (0.5 mmol, 2.5 eq.) was added, then cyclic 1,3-diketones (0.2 mmol, 1.0 eq.) in anhydrous THF (1 mL) was dropwise added. The mixture was warmed to 40 °C and stirred overnight. The reaction was carefully quenched with 25 mL 10% aqueous solution of acetic acid at 0 °C. The aqueous layer was extracted with ether (3×15 mL) and the combined organic layer was dried with anhydrous Na<sub>2</sub>SO<sub>4</sub>. The solvent was then evaporated under the reduced pressure and the residue was purified by column chromatography. The results are listed in the below.

- (1) (Table 4, entry 1), 4-hydroxy-4-phenylpentan-2-one, **1**, yield 32.2 mg, 90%; and 3-phenyl-2-cyclohexene-1-one, **31**, yield 28.9 mg, 82%.
- (2) (Table 4, entry 2), 4-hydroxy-4-(naphthalen-2-yl)pentan-2-one, **2**, yield 40.8 mg, 89%; 3-(naphthalen-2-yl)cyclohex-2-enone, **33**, yield 37.9 mg, 85%.
- (3) (Table 4, entry 3), 4-hydroxy-4-(4-methoxyphenyl)pentan-2-one, **3**, yield 35.4 mg, 85%; 3-(4'-methoxy)phenyl-2-cyclohexene-1-one, **36**, yield 31.9 mg, 79%.
- (4) (Table 4, entry 4), 3-hydroxy-1,3-diphenylbutan-1-one, **19**, yield 42.3 mg, 88%; 3-phenyl-2-cyclohexene-1-one), **31**, yield 27.9 mg, 81%.
- (5) (Table 4, entry 5), 3-hydroxy-3-(naphthalen-2-yl)-1-phenylbutan-1-one, **20**, yield 51.3 mg, 88%; 3-(naphthalen-2-yl)cyclohex-2-enone, **33**, yield 38.4 mg, 86%.
- (6) (Table 4, entry 6), 3-hydroxy-3-methyl-1-phenyldecan-1-one, **23**, yield 39.7 mg, 76%; 3-heptylcyclohex-2-enone, **37**, yield 26.4 mg, 68%.

## 7. References

- (1) I. Stahl and J. Gosselck, *synthesis*, 1980, 561.
- (2) H. Le, A. Batten and J. P. Morken, *Org. Lett.*, 2014, **16**, 2096.
- (3) M. Jacqueline and C. Perséphone, *Can. J. Chem.*, 1971, **49**, 4084.
- (4) P. Schiess, *Helv. Chim. Acta*, 1972, **55**, 2365.
- (5) H. E. Zimmerman, J. Jr. English, *J. Am. Chem. Soc.*, 1954, **76**, 2294.
- (6) C. S. A. Reddy, Z. Chen, T. Hatanaka, T. Minami and Y. Hatanaka, *Organometallics*, 2013, **32**, 3575.
- (7) M. Oishi, S. Aratake, H. Yamamoto, *J. Am. Chem. Soc.*, 1998, **120**, 8271.
- (8) V. V. Chelintsev and A. V. Pataraya, *Zh. Obshch. Khim*, 1941, **11**, 461.
- (9) X. D. Gu, Y. Y. Dai, T. T. Guo, A. Franchino, D. J. Dixon and J. X. Ye, *Org. Lett.*, 2015, **17**, 1505.
- (10) J. J. Li, C. H. Tan, J. X. Gong and Z. Yang, *Org. Lett.*, 2014, **16**, 5370.
- (11) M. Zhou, T. L. Liu, M. Cao, Z. J. Xue, H. Lv and X. M. Zhang, *Org. Lett.*, 2014, **16**, 3484.
- (12) Y. Izawa, C. W. Zheng and S. S. Stahl, *Angew. Chem. Int. Ed.*, 2013, **52**, 3672.
- (13) K. Takaishi, Y. Alen, K. Kawazu, N. Baba and S. Nakajima, *Biosci. Biotechnol. Biochem.*, 2004, **68**, 2398.
- (14) X. Yin, Y. Zheng, X. Feng, K. X. Jiang, Z. Wei, N. Gao and Y. C. Chen, *Angew. Chem. Int. Ed.*, 2014, **53**, 6245.
- (15) A. K. Verma, R. R. Jha, R. Chaudhary, R. K. Tiwari and A. K. Danodia, *Adv. Synth. Catal.*, 2013, **355**, 421.
- (16) S. Radomkit and A. H. Hoveyda, *Angew. Chem. Int. Ed.*, 2014, **53**, 3387.
- (17) X. Yin, Y. Zheng, X. Feng, K. Jiang, X. Z. Wei, N. Gao and Y. C. Chen, *Angew. Chem. Int. Ed.*, 2014, **53**, 6245.
- (18) Y. Fall, H. Doucet and M. Santelli, *Tetrahedron*, 2009, **65**, 489.
